# Supplementary material for: Allosteric modulation of cytochrome P450 enzymes by the NADPH cytochrome P450 reductase FMN-containing domain
Source: PubMed Central journal article supplement — J Biol Chem. 2023 Jul 28;299(9):105112. doi: 10.1016/j.jbc.2023.105112 (PMC10481364; doi:10.1016/j.jbc.2023.105112), 2023-07-28

Supporting Information for:

**Allosteric Modulation of Cytochrome P450 Enzymes by NADPH Cytochrome P450 Reductase**  
**Sarah Burriss-Hiday<sup>1</sup> and Emily E. Scott<sup>1,2,#</sup>**

From the Departments of Medicinal Chemistry<sup>1</sup> and Pharmacology<sup>2</sup>, Biological Chemistry<sup>2</sup> and the Programs in Chemical Biology<sup>2</sup> and Biophysics<sup>2</sup>, University of Michigan, Ann Arbor, MI 48109, USA

\*Running title: *Reductase Allosteric Modulation of P450 Enzymes*

**Supporting Figure 1.** Sequences for FMN domain, P450 catalytic domains, and the corresponding FMND/CYP450 proteins.

**Supporting Figure 2.** Aligned sequences for the reductase FMN domain, the isolated P450 enzymes, and the artificial fusion proteins thereof.

**Supporting Figure 3.** Generation and characterization of FMND/P450 fusion enzymes compared to the corresponding isolated P450 enzyme.

**Supporting Figure 4.** Spectral titrations for drug-metabolizing P450 enzymes CYP3A4, CYP2A6, and CYP2D6, and the corresponding FMND/CYP3A4, FMND/CYP2A6m and FMND/CYP2D6 fusion proteins with their respective substrates and inhibitors.

**Supporting Figure 5.** Spectral titrations for steroidogenic CYP17A1 and CYP21A2, and the corresponding FMND/CYP17A1 and FMND/CYP21A2 fusion proteins with their respective substrates and inhibitors.

**Supporting Figure 1. Sequences for FMN domain, P450 catalytic domains, and the corresponding FMND/CYP450 proteins.** The human NADPH-cytochrome P450 FMN domain protein sequence (blue) was identical to a previously-reported, folded domain, containing FMN (44). The TDGTS linker (black, bold) is a synthetic database-informed sequence (54) successfully used to generate similar fusions of mitochondrial P450 fusion to its redox partner adrenodoxin (39). The P450 sequences (red) are those of the catalytic domain used to determine structures. The C-terminal His-tags (green) were added to facilitate purification using metal-affinity chromatography.

#### FMN Domain

MGTLTSSVRESSFVEKMKKTGRNIIVFYGSQTGTAEFANRLSKDAHRYGMRGMSADPEEYDLADLSSLP  
EIDNALVVFCMATYEGDPTDNAQDFYDWLQETDVDLSGVKFAVFGNGKTYEHFNAMGKYVDKRLEQLG  
AQRIFELGLGDDDDGNLEEDFITWREQFWPAVCEHFGVEATGEESSHHHHHH

#### CYP3A4

MALYGTHSHGLFKKLGIPGPTPLPFLGNILSYHKGFCMFDMECHKKYGKVVWGFYDGQQP  
VLAITDPMIKTVLVKECYSVFTNRRPFGPVGFMKSAISIAEDEEWKRLRSLLSPTFTSG  
KLKEMVPIIAQYGDVLRNLRREAETGKPVTLKDVFGAYSMDVITSTSTSGVNIIDSLNNPQ  
DPFVENTKLLRFDFLDPFFLSITVFPFLIPILEVLNICVFPREVTNFLRKSVKRMKESR  
LEDTQKHRVDFLQLMIDSQNSKETESHKALSDLELVAQSIIFIFAGYETTSSVLSFIMYE  
LATHPDVQQKLQEEIDAVLPNKAPPTYDTVLQMEYLDMVVNETLRLFPPIAMRLERVCKKD  
VEINGMFI PKGVVMI PSYALHRDPKYWTEPEKFLPERFSKKNKDNIDPYIYTPFGSGPR  
NCIGMRFALMNMKLALIRVLQNF SFKPKKETQIPLKLSLGGLLQPEKPVVLKVESRDGTV  
SGAHHHH

#### FMND/CYP3A4

MGTLTSSVRESSFVEKMKKTGRNIIVFYGSQTGTAEFANRLSKDAHRYGMRGMSADPEEYDLADLSSLP  
EIDNALVVFCMATYEGDPTDNAQDFYDWLQETDVDLSGVKFAVFGNGKTYEHFNAMGKYVDKRLEQLG  
AQRIFELGLGDDDDGNLEEDFITWREQFWPAVCEHFGVEATGEESS**TDGTS**MALYGTHSHGLFKKLGIPG  
PTPLPFLGNILSYHKGFCMFDMECHKKYGKVVWGFYDGQQPVLAITDPMIKTVLVKECYSVFTNRRPFGP  
VGFMKSAISIAEDEEWKRLRSLLSPTFTSGKLKEMVPIIAQYGDVLRNLRREAETGKPVTLKDVFGAYS  
MDVITSTSTSGVNIIDSLNNPQDPFVENTKLLRFDFLDPFFLSITVFPFLIPILEVLNICVFPREVTNFLR  
KSVKRMKESRLEDTQKHRVDFLQLMIDSQNSKETESHKALSDLELVAQSIIFIFAGYETTSSVLSFIMYEL  
ATHPDVQQKLQEEIDAVLPNKAPPTYDTVLQMEYLDMVVNETLRLFPPIAMRLERVCKKDVEINGMFI PKG  
VVMI PSYALHRDPKYWTEPEKFLPERFSKKNKDNIDPYIYTPFGSGPRNCIGMRFALMNMKLALIRVLQ  
NF SFKPKKETQIPLKLSLGGLLQPEKPVVLKVESRDGTVSGAHHHHHH

#### CYP2D6

MAKKTSSKGKLPPLPLPGLGNLLHVDFQNTPYCFDQLRRRFGDVFSLQLAWTPVVVLN  
GLAAVREALVTHGEDTADRPPVPIITQILGFGPRSQGVFLARYGPAWREQRRFSVSTLRNL  
GLGKKSLEQWVTEEAACLCAAFANHSGRPFRPNGLLDKAVSNVIASLTCGRRFEYDDPRF  
LRLDLAQEGLKEESGFLREVLNAVPLLHI PALAGKVLRFQKAFALTQLDELLEHRMTW  
DPAQPPRDLEAFLAEMEKAKGNPESSFNDENLRIVVADLFSAGMVTSTTTLAWGLLLMI  
LHPDVQRRVQQEIDDVIGQVRRPEMGDQAHMPYTTAVIHEVQRFQGDIVPLGVTHMTSRDI  
EVQGFRI PKGTTLITNLSSVLKDEAVWEKPFRRFHPEHFLDAQGHFVKPEAFLPFSAGRA  
CLGEPLARMELFLFFTSLQHFSFSVPTGQPRPSHHGVFAFLVSPSPYELCAVPRHHHH

#### FMND/CYP2D6

MGTLTSSVRESSFVEKMKKTGRNIIVFYGSQTGTAEFANRLSKDAHRYGMRGMSADPEEYDLADLSSLP  
EIDNALVVFCMATYEGDPTDNAQDFYDWLQETDVDLSGVKFAVFGNGKTYEHFNAMGKYVDKRLEQLG  
AQRIFELGLGDDDDGNLEEDFITWREQFWPAVCEHFGVEATGEESS**TDGTS**AKKTSSKGKLPPLPLPGL

GNNLHVDFQNTPYCFDQLRRRFGDVFSLQLAWTPVVVLNGLAAVREALVTHGEDTADRPPVPITQILGFG  
PRSQGVFLARYGPAWREQRRFSVSTLRNLGLGKKSLEQWVTEEAACLCAAFANHSGRPFRPNGLLDKAVS  
NVIASLTCGRREFEYDDPRFLRLDLAQEGLKEESGFLREVLNAVVPVLLHIPALAGKVLRFQKAFQTQDE  
LLTEHRMTWDPAQPPRDLTEAFLAEMEKAKGNPESSFNNDENLRIVVADLFSAGMVTSTTLLAWGLLLMIL  
HPDVQRRVQQEIDDVIGQVRRPEMGDQAHMPYTTAVIHEVQRFQGDIVPLGVTHMTSRDIEVQGFRI PKGT  
TLITNLSSVLKDEAVWEKPFRRFHPHFLLDAQGHFVKPEAFLPFSAGRRACLGEPLARMELFLFFTSLLQH  
FSFSVPTGQPRPSHHGVFAFLVSPSPYELCAVPRHHHHH

### CYP2A6

MAKKTSSKGKLP PGPTPLPFIGNYLQLNTEQMYNSLMKISERYGPVFTIHLGPRRVVVL CGHDA  
VREALVDQAEFFSGRGEQATFDWVFKGYGVVFSNGERAKQLRRFSIATLRDFGVGKRGIEERI Q  
EEAGFLIDLALRGTTGGANIDPTFFLSRTVSNVISSIVFGDRFDYKDKEFLSLLRMMLGIFQFTST  
STGQLYEMFSSVMKHLPGPQQQAFQLLQGLEDFIAKKVEHNQRTLDPNSPRDFIDSF LIRMQEE  
EKNPNTEFYLNKLVMTTLNLFIGGTETVSTTLRYGFLLLMKHPEVEAKVHEEIDRVIGKNRQPK  
FEDRAKMPYMEAVIHEIQRFQGDVIPMSLARRVKKDTKFRDFFLPKGTEVYPMLGSVLRDPSFFS  
NPQDFNPQHFLNEKGQFKSDAFVPPFSIGKRNCFGEGGLARMELFLFFTTVMQNFRLKSSQSPKD  
IDVSPKHVGFATIPRNYTMSFLPRHHHH

### FMND/CYP2A6

MGTLTSSVRESSFVEKMKKTGRNIIVFYGSQTGTAEFANRLSKDAHRYGMRGMSADPEEYDLADLSSLP  
EIDNALVVFCMATYGECDPTDNAQDFYDWLQETDVDLSGVKFAVFGGLGNKTYEHFNAMGKYVDKRLEQLG  
AQRIFELGLGDDDDGNLEEDFITWREQFWPAVCEHFGVEATGEESSTDGTSMAKKTSSKGKLP PGPTPLP  
FIGNYLQLNTEQMYNSLMKISERYGPVFTIHLGPRRVVVL CGHDAVREALVDQAEFFSGRGEQA  
TFDWVFKGYGVVFSNGERAKQLRRFSIATLRDFGVGKRGIEERI QEEAGFLIDLALRGTTGGANID  
PTFFLSRTVSNVISSIVFGDRFDYKDKEFLSLLRMMLGIFQFTSTSTGQLYEMFSSVMKHLPGP  
QQQAFQLLQGLEDFIAKKVEHNQRTLDPNSPRDFIDSF LIRMQEEEKNPNTEFYLNKLVMTTLN  
LFIGGTETVSTTLRYGFLLLMKHPEVEAKVHEEIDRVIGKNRQPKFEDRAKMPYMEAVIHEIQRF  
QGDVIPMSLARRVKKDTKFRDFFLPKGTEVYPMLGSVLRDPSFFSNPQDFNPQHFLNEKGQFKK  
SDAFVPPFSIGKRNCFGEGGLARMELFLFFTTVMQNFRLKSSQSPKIDVSPKHVGFATIPRNYTM  
SFLPRHHHHHHHHHH

### CYP17A1

MAKKTGAKYPKSLLSLPLVGSPLPFLPRHGHMHNFFKLQKKYGPIYSVRMGTKTTVIVGHHQLA  
KEVLIKKGKDFSGRPQMATLDIASNNRKGIAFADSGAHWQLHRRLAMATFALFKDGDQKLEKII  
CQEISTLCDMLATHNGQSIDISFPVFAVAVTNVISLICFNNTSYKNGDPELNVIQNYNEGIIDNLS  
KDSLVDLVPWLKIFPNKTLKLSHVKIRNDLLNKILENYKEKFRSDSITNMLDTLMQAKMNSD  
NGNAGPDQDSELLSDNHILTTIGDIFGAGVETTSVVKWTLAFLHNPQVKKLYEEIDQNVGF  
SRTPTISDRNRLLEATIREVLRRLRPVAPMLIPKANVDSSIGEFVAVDKGTEVIINLWALHHN  
EKEWHQPDQFMPERFLNPAGTQLISPSVSYLPFGAGPRSCIGEILARQELFLIMAWLLQRFDLE  
VPDDGQLPSLEGIPKVVFLIDSFVKVIKVRQAWREAQAEGSTHHHH

### FMND/CYP17A1

MGTLTSSVRESSFVEKMKKTGRNIIVFYGSQTGTAEFANRLSKDAHRYGMRGMSADPEEYDLADLSSLP  
EIDNALVVFCMATYGECDPTDNAQDFYDWLQETDVDLSGVKFAVFGGLGNKTYEHFNAMGKYVDKRLEQLG  
AQRIFELGLGDDDDGNLEEDFITWREQFWPAVCEHFGVEATGEESSTDGTSMAKKTGAKYPKSLLSLPLV  
GSLPFLPRHGHMHNFFKLQKKYGPIYSVRMGTKTTVIVGHHQLAKEVLIKKGKDFSGRPQMAT  
LDIASNNRKGIAFADSGAHWQLHRRLAMATFALFKDGDQKLEKII CQEISTLCDMLATHNGQSI  
DISFPVFAVAVTNVISLICFNNTSYKNGDPELNVIQNYNEGIIDNLSKDSLVDLVPWLKIFPNKTL

EKLSHVKIRNDLLNKILENYKEKFRSDSITNMLDTLMQAKMNSDNGNAGPDQDSELLSDNHIL  
TTIGDIFGAGVETTTSVVKWTLAFLLLHNPQVKKKLYEEIDQNVGFSRTPTISDRNRLLEATI  
REVLRLRPVAPMLIPHKANVDSSIGFAVDKGTEVIINLWALHHNEKEWHQPDQFMPERFLNPA  
GTQLISPSVSYLPFGAGPRSCIGEILARQELFLIMAWLLQRFDLEVPDDGQLPSLEGIPKVVFL  
IDSFVKIKVRQAWREAQAEGSTHHHH

#### CYP21A1

MAKKTSSKGKLPPLAPGFLHLLQPDLPIYLLGLTQKFGPIYRLHLGLQDVVVLNSKRTIEEAMV  
KKWADFAGRPEPLTYKLVSKNYPDLSLGDYSLWKAHKKLTRSALLLGIRDSMEPVVEQLTQEF  
CERMRAQPGTPVAIEEEFSLTCSIICYLTFGDKIKDDNLMPAYYKCIQEVLTWWSHQIIVD  
VIPFLRFFPNPGLRRLKQAIEKRDIHIVEMQLRQHKEVSLVAGQWRDMDYMLQGVQPSMEEGSG  
QLLEGHVHMAAVDLLIGGTETTANTLSWAVVFLHHPEIQORLQEELDELGPGASSSRVPYKD  
RARLPLLNATIAEVLRLRPVVPLALPHRTTRPSSISGYDIPEGTVIIPNLQGAHLDETVERPH  
EFPDRFLEPGKNSRALAFGCGARVCLGEPLARLELFVVLTRLLQAFTLLPSGDALPSLQPLPH  
CSVILKMQPFQVRLQPRGMGAHSPGQNQHSHHHH

#### FMND/CYP21A2

MGTLTSSVRESSFVEKMKKTGRNIVFYGSQTGTAEFANRLSKDAHRYGMRGMSADPEEYDLADLSSLP  
EIDNALVVFCMATYEGDPTDNAQDFYDWLQETDVDLSGVKFAVFGNGKTYEHFNAMKYVDKRLEQLG  
AQRIFELGLGDDDGLEEDFITWREQFWPAVCEHFGVEATGEESS**TDGTS**AKKTSSKGKLPPLAPGFLHL  
LQPDLPYLLGLTQKFGPIYRLHLGLQDVVVLNSKRTIEEAMVKKWADFAGRPEPLTYKLVSKNYPDLSL  
GDYSLWKAHKKLTRSALLLGIRDSMEPVVEQLTQEFCEMRAQPGTPVAIEEEFSLTCSIICYLTFG  
KIKDDNLMPAYYKCIQEVLTWWSHQIIVDVIPFLRFFPNPGLRRLKQAIEKRDIHIVEMQLRQHKEV  
AGQWRDMDYMLQGVQPSMEEGSGQLLEGHVHMAAVDLLIGGTETTANTLSWAVVFLHHPEIQORLQE  
ELDDELGPGASSSRVPYKDRARLPLLNATIAEVLRLRPVVPLALPHRTTRPSSISGYDIPEGTVIIPNLQ  
GAHLDETVERPHEFPDRFLEPGKNSRALAFGCGARVCLGEPLARLELFVVLTRLLQAFTLLPSGDALP  
SLQPLPHCSVILKMQPFQVRLQPRGMGAHSPGQNQHSHHHH

**Supporting Figure 2. Aligned sequences for the reductase FMN domain, the isolated P450 enzymes, and the artificial fusion proteins thereof.** The TDGTS linker (black, bold) is a synthetic database-informed sequence (54) successfully used to generate similar fusions of mitochondrial P450 fusion to its redox partner adrenodoxin (39). The P450 sequences (red) are those of the catalytic domain used to determine structures. The C-terminal His-tags (green) were added to facilitate purification using metal-affinity chromatography.

|             |                                                                           |
|-------------|---------------------------------------------------------------------------|
| FMND        | MGTLTSSVRESSFVEKMKKTGRNIIVFYGSQTGTAEEFANRLSKDAHRYGMRGMSADPEE              |
| FMND/CYP3A4 | MGTLTSSVRESSFVEKMKKTGRNIIVFYGSQTGTAEEFANRLSKDAHRYGMRGMSADPEE              |
| CYP3A4      | -----                                                                     |
| FMND        | YDLADLSSLPEIDNALVVFCMATYEGEDPTDNAQDFYDWLQETDVDLSGVKFAVFGLGNK              |
| FMND/CYP3A4 | YDLADLSSLPEIDNALVVFCMATYEGEDPTDNAQDFYDWLQETDVDLSGVKFAVFGLGNK              |
| CYP3A4      | -----                                                                     |
| FMND        | TYEHFNAMGKYVDKRLEQLGAQRIFELGLGDDDDGNLEEDFITWREQFWPAVCEHFVGEAT             |
| FMND/CYP3A4 | TYEHFNAMGKYVDKRLEQLGAQRIFELGLGDDDDGNLEEDFITWREQFWPAVCEHFVGEAT             |
| CYP3A4      | -----                                                                     |
| FMND        | GEES                                                                      |
| FMND/CYP3A4 | <b>GEES<b>TDGTS</b></b> MALYGTHSHGLFKKLGIPGPTPLPFLGNILSYHKGFCMFDECHKKYGKV |
| CYP3A4      | ----- <b>MALYGTHSHGLFKKLGIPGPTPLPFLGNILSYHKGFCMFDECHKKYGKV</b> -----      |
| FMND        | -----                                                                     |
| FMND/CYP3A4 | WGFYDQQQPVLAITDPDMIKTVLVKECYSVFTNRRPFGPVGFMKSAISIAEDEEWKRLRS              |
| CYP3A4      | WGFYDQQQPVLAITDPDMIKTVLVKECYSVFTNRRPFGPVGFMKSAISIAEDEEWKRLRS              |
| FMND        | -----                                                                     |
| FMND/CYP3A4 | LLSPTFTSGKLEKEMVPIIAQYGDVLRNLRREAETGKPVTLKDVFGAYSMDVITSTSTFGV             |
| CYP3A4      | LLSPTFTSGKLEKEMVPIIAQYGDVLRNLRREAETGKPVTLKDVFGAYSMDVITSTSTFGV             |
| FMND        | -----                                                                     |
| FMND/CYP3A4 | NIDSLNNPQDPFVENTKKLLRFDFLDPFFLSITVFPFLIPILEVLNICVFPREVTNFLRK              |
| CYP3A4      | NIDSLNNPQDPFVENTKKLLRFDFLDPFFLSITVFPFLIPILEVLNICVFPREVTNFLRK              |
| FMND        | -----                                                                     |
| FMND/CYP3A4 | SVKRMKESRLEDTQKHRVDFLQLMIDSQNSKETESHKALSDELVAQSIIFIFAGYETTS               |
| CYP3A4      | SVKRMKESRLEDTQKHRVDFLQLMIDSQNSKETESHKALSDELVAQSIIFIFAGYETTS               |
| FMND        | -----                                                                     |
| FMND/CYP3A4 | SVLSFIMYELATHPDVQKQLQEEIDAVLPNKAPPTYDTVLQMEYLDMVVNETLRLFPIAM              |
| CYP3A4      | SVLSFIMYELATHPDVQKQLQEEIDAVLPNKAPPTYDTVLQMEYLDMVVNETLRLFPIAM              |
| FMND        | -----                                                                     |
| FMND/CYP3A4 | RLERVCKKDVINGMFI PKGVVMI PSYALHRDPKYWTEPEKFLPERFSKKNKDNIDPYI              |
| CYP3A4      | RLERVCKKDVINGMFI PKGVVMI PSYALHRDPKYWTEPEKFLPERFSKKNKDNIDPYI              |
| FMND        | -----                                                                     |
| FMND/CYP3A4 | YTPFGSGPRNCIGMRFALMNMKLALIRVLQNF'SFKPKKETQIPLKLSLGGLLQPEKPVVL             |
| CYP3A4      | YTPFGSGPRNCIGMRFALMNMKLALIRVLQNF'SFKPKKETQIPLKLSLGGLLQPEKPVVL             |
| FMND        | ----- <b>HHHHHH</b> -----                                                 |
| FMND/CYP3A4 | <b>KVESRDGTVSGA<b>HHHHHH</b></b>                                          |
| CYP3A4      | <b>KVESRDGTVSGA<b>HHHH</b></b> -----                                      |

FMND  
FMND/CYP2D6  
CYP2D6

MGTLTSSVRESSFVEKMKKTGRNIIVFYGSQTGTAEFFANRLSKDAHRYGMRGMSADPEE  
MGTLTSSVRESSFVEKMKKTGRNIIVFYGSQTGTAEFFANRLSKDAHRYGMRGMSADPEE  
-----

FMND  
FMND/CYP2D6  
CYP2D6

YDLADLSSLPEIDNALVVFCMATYGECDPTDNAQDFYDWLQETDVLDSGVKFAVFGLNK  
YDLADLSSLPEIDNALVVFCMATYGECDPTDNAQDFYDWLQETDVLDSGVKFAVFGLNK  
-----

FMND  
FMND/CYP2D6  
CYP2D6

TYEHFNAMGKYVDKRLEQLGAQRIFELGLGDDDNLEEDFITWREQFWPAVCEHFGVEAT  
TYEHFNAMGKYVDKRLEQLGAQRIFELGLGDDDNLEEDFITWREQFWPAVCEHFGVEAT  
-----

FMND  
FMND/CYP2D6  
CYP2D6

GEES-----  
GEES**TDGTS**AKKTSSKGKLP PGPLPLPGLGNLLHVDFQNTPYCFDQLRRRFGDVFSLQL  
-----**MAKKTSSKGKLP PGPLPLPGLGNLLHVDFQNTPYCFDQLRRRFGDVFSLQL**

FMND  
FMND/CYP2D6  
CYP2D6

-----  
AWTPVVVNLGLAAVREALVTHGEDTADRPPVPITQILGFGRSQGVFLARYGPAWREQRR  
AWTPVVVNLGLAAVREALVTHGEDTADRPPVPITQILGFGRSQGVFLARYGPAWREQRR

FMND  
FMND/CYP2D6  
CYP2D6

-----  
FSVSTLRNLGLGKKSLEQWVTEEAACLCAAFANHSGRPFPPNGLLDKAVSNVIASLTCGR  
FSVSTLRNLGLGKKSLEQWVTEEAACLCAAFANHSGRPFPPNGLLDKAVSNVIASLTCGR

FMND  
FMND/CYP2D6  
CYP2D6

-----  
RFEYDDPRFLRLLDLAQEGLKEESGFLREVLNAV PVL LHI PALAGKVLRFQKAF L T Q L D E  
RFEYDDPRFLRLLDLAQEGLKEESGFLREVLNAV PVL LHI PALAGKVLRFQKAF L T Q L D E

FMND  
FMND/CYP2D6  
CYP2D6

-----  
LLTEHRMTWDP AQ P P R D L T E A F L A E M E K A K G N P E S S F N D E N L R I V V A D L F S A G M V T T S T T  
LLTEHRMTWDP AQ P P R D L T E A F L A E M E K A K G N P E S S F N D E N L R I V V A D L F S A G M V T T S T T

FMND  
FMND/CYP2D6  
CYP2D6

-----  
LAWGLLLMILHPDVQRRVQQEIDDVIGQVRRPEMGDQAHPYTTAVIHEVQRFGDIVPLG  
LAWGLLLMILHPDVQRRVQQEIDDVIGQVRRPEMGDQAHPYTTAVIHEVQRFGDIVPLG

FMND  
FMND/CYP2D6  
CYP2D6

-----  
VTHMTRSRIEVQGFRI PKGTTLITNLSSVLKDEAVWEKPF RFHPEHFLDAQGHFVKPEAF  
VTHMTRSRIEVQGFRI PKGTTLITNLSSVLKDEAVWEKPF RFHPEHFLDAQGHFVKPEAF

FMND  
FMND/CYP2D6  
CYP2D6

-----  
LPFSAGRRACLGEPLARMEFLFFTSLLQHFSFSVPTGQPRPSHHGVFAFLVSPSPYELC  
LPFSAGRRACLGEPLARMEFLFFTSLLQHFSFSVPTGQPRPSHHGVFAFLVSPSPYELC

FMND  
FMND/CYP2D6  
CYP2D6

----**HHHHHH**  
**AVPRHHHHHH**  
**AVPRHHHH--**

|                               |                                                                                                                                            |
|-------------------------------|--------------------------------------------------------------------------------------------------------------------------------------------|
| FMND<br>FMND/CYP2A6<br>CYP2A6 | MGTLTSSVRESSFVEKMKKTGRNIIVFYGSQTGTAEFFANRLSKDAHRYGMRGMSADPEE<br>MGTLTSSVRESSFVEKMKKTGRNIIVFYGSQTGTAEFFANRLSKDAHRYGMRGMSADPEE<br>-----      |
| FMND<br>FMND/CYP2A6<br>CYP2A6 | YDLADLSSLPEIDNALVVFCMATYEGDPTDNAQDFYDWLQETDVDLSGVKFAVFGLGNK<br>YDLADLSSLPEIDNALVVFCMATYEGDPTDNAQDFYDWLQETDVDLSGVKFAVFGLGNK<br>-----        |
| FMND<br>FMND/CYP2A6<br>CYP2A6 | TYEHFNAMGKYVDKRLEQLGAQRIFELGLGDDDDGNLEEDFITWREQFWPAVCEHFVGEAT<br>TYEHFNAMGKYVDKRLEQLGAQRIFELGLGDDDDGNLEEDFITWREQFWPAVCEHFVGEAT<br>-----    |
| FMND<br>FMND/CYP2A6<br>CYP2A6 | GEES-----<br>GEES <b>TDGTS</b> MAKKTSSKGLPPGPTPLPFIGNYLQLNTEQMYNSLMKISERYGPVFTIH<br>-----MAKKTSSKGLPPGPTPLPFIGNYLQLNTEQMYNSLMKISERYGPVFTIH |
| FMND<br>FMND/CYP2A6<br>CYP2A6 | -----<br>LGPRRVVLCGHDAVREALVDQAEFSGRGEQATFDWVFKGYGVVFSNGERAKQLRRFSI<br>LGPRRVVLCGHDAVREALVDQAEFSGRGEQATFDWVFKGYGVVFSNGERAKQLRRFSI          |
| FMND<br>FMND/CYP2A6<br>CYP2A6 | -----<br>ATLRDFGVGKRGIEERIQQEAGFLIDALRGTTGGANIDPTFFLSRTVSNVISSIVFGDRFD<br>ATLRDFGVGKRGIEERIQQEAGFLIDALRGTTGGANIDPTFFLSRTVSNVISSIVFGDRFD    |
| FMND<br>FMND/CYP2A6<br>CYP2A6 | -----<br>YKDKEFLSLLRMMLGIFQFTSTSTGQLYEMFSSVMKHLPGPQQQAFQLLQGLEDFIAKKV<br>YKDKEFLSLLRMMLGIFQFTSTSTGQLYEMFSSVMKHLPGPQQQAFQLLQGLEDFIAKKV      |
| FMND<br>FMND/CYP2A6<br>CYP2A6 | -----<br>EHNQRTLDPNSPRDFIDSFLIRMQEEKPNTEFYLNLMVTTLNLFIGGTETVSTTLRY<br>EHNQRTLDPNSPRDFIDSFLIRMQEEKPNTEFYLNLMVTTLNLFIGGTETVSTTLRY            |
| FMND<br>FMND/CYP2A6<br>CYP2A6 | -----<br>GFLLLMKHPEVEAKVHEEIDRVI GKNRQPKFEDRAKMPYMEAVIHEIQRF GDVIPMSLAR<br>GFLLLMKHPEVEAKVHEEIDRVI GKNRQPKFEDRAKMPYMEAVIHEIQRF GDVIPMSLAR  |
| FMND<br>FMND/CYP2A6<br>CYP2A6 | -----<br>RVKKDKTKFRDFFLPKGTEVYPMLGSVLRDPSFFSNPQDFNPQHFLNEKGQFKKSDAFVFP<br>RVKKDKTKFRDFFLPKGTEVYPMLGSVLRDPSFFSNPQDFNPQHFLNEKGQFKKSDAFVFP    |
| FMND<br>FMND/CYP2A6<br>CYP2A6 | -----<br>SIGKRNCFGEGLARMELFLFFTVMQNFRLKSSQSPKIDIVSPKHVGFATIPRNYTMSFL<br>SIGKRNCFGEGLARMELFLFFTVMQNFRLKSSQSPKIDIVSPKHVGFATIPRNYTMSFL        |
| FMND<br>FMND/CYP2A6<br>CYP2A6 | ---HHHHH---<br>PRHHHHHHHHH<br>PRHHHH-----                                                                                                  |

|                                 |                                                                                                                                            |
|---------------------------------|--------------------------------------------------------------------------------------------------------------------------------------------|
| FMND<br>FMND/CYP17A1<br>CYP17A1 | MGTLTSSVRESSFVEKMKKTGRNIIVFYGSQTGTAEFFANRLSKDAHRYGMRGMSADPEE<br>MGTLTSSVRESSFVEKMKKTGRNIIVFYGSQTGTAEFFANRLSKDAHRYGMRGMSADPEE<br>-----      |
| FMND<br>FMND/CYP17A1<br>CYP17A1 | YDLADLSSLPEIDNALVVFCMATYGECDPTDNAQDFYDWLQETDVLDSGVKFAVFLGNK<br>YDLADLSSLPEIDNALVVFCMATYGECDPTDNAQDFYDWLQETDVLDSGVKFAVFLGNK<br>-----        |
| FMND<br>FMND/CYP17A1<br>CYP17A1 | TYEHFNAMGKYVDKRLEQLGAQRIFELGLGDDGNLEEDFITWREQFWPAVCEHFGVEAT<br>TYEHFNAMGKYVDKRLEQLGAQRIFELGLGDDGNLEEDFITWREQFWPAVCEHFGVEAT<br>-----        |
| FMND<br>FMND/CYP17A1<br>CYP17A1 | GEES-----<br>GEES <b>TDGTS</b> MAKKTGAKYPKSLLSLPLVGSPLPFLPRHGHMHNFFKLQKKGPIYSVRM<br>-----MAKKTGAKYPKSLLSLPLVGSPLPFLPRHGHMHNFFKLQKKGPIYSVRM |
| FMND<br>FMND/CYP17A1<br>CYP17A1 | -----<br>GKTTTIVGHHQLAKEVLIKKGKDFSGRPQMATLDIASNNRKGIAFADSGAHWQLHRRLA<br>GKTTTIVGHHQLAKEVLIKKGKDFSGRPQMATLDIASNNRKGIAFADSGAHWQLHRRLA        |
| FMND<br>FMND/CYP17A1<br>CYP17A1 | -----<br>MATFALFKDGDQKLEKIICQEISTLCDMLATHNGQSIDISFPVFAVTVNISLICFNNTSY<br>MATFALFKDGDQKLEKIICQEISTLCDMLATHNGQSIDISFPVFAVTVNISLICFNNTSY      |
| FMND<br>FMND/CYP17A1<br>CYP17A1 | -----<br>KNGDPELNVIQYNEGIIDNLSKDSLVDLVPWLKIFPNKLEKLSHVKIRNDLLNKILE<br>KNGDPELNVIQYNEGIIDNLSKDSLVDLVPWLKIFPNKLEKLSHVKIRNDLLNKILE            |
| FMND<br>FMND/CYP17A1<br>CYP17A1 | -----<br>NYKEKFRSDSITNMLDTLMQAKMNSDNGNAGPDQDSELSDNHILTTIGDIFGAGVETTT<br>NYKEKFRSDSITNMLDTLMQAKMNSDNGNAGPDQDSELSDNHILTTIGDIFGAGVETTT        |
| FMND<br>FMND/CYP17A1<br>CYP17A1 | -----<br>SVVKWTLAFLHNPQVKKKLYEEIDQNVGFSRTPTISDRNRLLEATIREVLRRLRPVAP<br>SVVKWTLAFLHNPQVKKKLYEEIDQNVGFSRTPTISDRNRLLEATIREVLRRLRPVAP          |
| FMND<br>FMND/CYP17A1<br>CYP17A1 | -----<br>MLIPHKANVDSSIGFAVDKGTEVIINLWALHHNEKEWHQPDQFMPERFLNPAGTQLISP<br>MLIPHKANVDSSIGFAVDKGTEVIINLWALHHNEKEWHQPDQFMPERFLNPAGTQLISP        |
| FMND<br>FMND/CYP17A1<br>CYP17A1 | -----<br>SVSYLPFGAGPRSCIGEILARQELFLIMAWLLQRFDLEVPDDGQLPSLEGIPKVVFLLIDS<br>SVSYLPFGAGPRSCIGEILARQELFLIMAWLLQRFDLEVPDDGQLPSLEGIPKVVFLLIDS    |
| FMND<br>FMND/CYP17A1<br>CYP17A1 | -----HHHHH<br>FKVKIKVRQAWREAQEGSTHHHH<br>FKVKIKVRQAWREAQEGSTHHHH                                                                           |



|                                 |                                                                                                                                            |
|---------------------------------|--------------------------------------------------------------------------------------------------------------------------------------------|
| FMND<br>FMND/CYP21A2<br>CYP21A2 | MGTLTSSVRESSFVEKMKKTGRNIIVFYGSQTGTAEFFANRLSKDAHRYGMRGMSADPEE<br>MGTLTSSVRESSFVEKMKKTGRNIIVFYGSQTGTAEFFANRLSKDAHRYGMRGMSADPEE<br>-----      |
| FMND<br>FMND/CYP21A2<br>CYP21A2 | YDLADLSSLPEIDNALVVFCMATYEGGDPTDNAQDFYDWLQETDVLDSGVKFAVFLGNK<br>YDLADLSSLPEIDNALVVFCMATYEGGDPTDNAQDFYDWLQETDVLDSGVKFAVFLGNK<br>-----        |
| FMND<br>FMND/CYP21A2<br>CYP21A2 | TYEHFNAMGKYVDKRLEQLGAQRIFELGLGDDDNLEEDFITWREQFWPAVCEHFGVEAT<br>TYEHFNAMGKYVDKRLEQLGAQRIFELGLGDDDNLEEDFITWREQFWPAVCEHFGVEAT<br>-----        |
| FMND<br>FMND/CYP21A2<br>CYP21A2 | GEES-----<br>GEES <b>TDGTS</b> AKKTSKGLPPLAPGFLHLLQPDLPITYLLGLTQKFGPIYRLHLGLQDVV<br>-----MAKTSKGLPPLAPGFLHLLQPDLPITYLLGLTQKFGPIYRLHLGLQDVV |
| FMND<br>FMND/CYP21A2<br>CYP21A2 | -----<br>VLNSKRTEEAMVKKWADFAGRPEPLTYKLVSKNYPDLSLGDYSLLWKAHKKLTRSALLL<br>VLNSKRTEEAMVKKWADFAGRPEPLTYKLVSKNYPDLSLGDYSLLWKAHKKLTRSALLL        |
| FMND<br>FMND/CYP21A2<br>CYP21A2 | -----<br>GIRDSMEPVVEQLTQEFCEMRAQPGTPVAIEEEFSLTCSIICYLTFGDKIKDDNLMPA<br>GIRDSMEPVVEQLTQEFCEMRAQPGTPVAIEEEFSLTCSIICYLTFGDKIKDDNLMPA          |
| FMND<br>FMND/CYP21A2<br>CYP21A2 | -----<br>YYKCIQEVLTWWSHSIQIVDVI PFLRFFPNPGLRRLKQAI EKRDHIVEMQLRQHESLV<br>YYKCIQEVLTWWSHSIQIVDVI PFLRFFPNPGLRRLKQAI EKRDHIVEMQLRQHESLV      |
| FMND<br>FMND/CYP21A2<br>CYP21A2 | -----<br>AGQWRDMDYMLQGVAQPSMEEGSGQLLEGHVHMAAVDLLIGGTETTANTLSWAVVFLH<br>AGQWRDMDYMLQGVAQPSMEEGSGQLLEGHVHMAAVDLLIGGTETTANTLSWAVVFLH          |
| FMND<br>FMND/CYP21A2<br>CYP21A2 | -----<br>HPEIQQLQEELDHELPGASSSRVPYKDRARLPLLNATIAEVLRLRPVVPLALPHRTR<br>HPEIQQLQEELDHELPGASSSRVPYKDRARLPLLNATIAEVLRLRPVVPLALPHRTR            |
| FMND<br>FMND/CYP21A2<br>CYP21A2 | -----<br>PSSISGYDIPEGTVIIPNLQGAHLDET VWERPHEFWPDRFLEPGKNSRALAFGCGARVCL<br>PSSISGYDIPEGTVIIPNLQGAHLDET VWERPHEFWPDRFLEPGKNSRALAFGCGARVCL    |
| FMND<br>FMND/CYP21A2<br>CYP21A2 | -----<br>GEPLARLELFVVLTRLLQAFTLLPSGDALPSLQPLPHCSVILKMQPFQVRLQPRGMGAHS<br>GEPLARLELFVVLTRLLQAFTLLPSGDALPSLQPLPHCSVILKMQPFQVRLQPRGMGAHS      |
| FMND<br>FMND/CYP21A2<br>CYP21A2 | ----- <b>HHHHHH</b><br><b>PGQNQH</b> HHHHHH<br><b>PGQNQH</b> HHHHHH                                                                        |

**Supporting Figure 3. Generation and characterization of FMND/P450 fusion enzymes compared to the corresponding isolated P450 enzyme.** Fusion enzymes consisted of the reductase FMN domain plus a 5-amino acid linker plus the catalytic P450 domain with a histidine tag, while the isolated P450 enzymes had only a C-terminal histidine tag (top graphics). These constructs yielded purified protein with a water-bound Soret peak in the absolute spectrum (main image) and a typical reduced-carbon monoxide difference spectrum (inset). The purified protein runs on an SDS-PAGE gel at the expected molecular weight of 75-77 kDa for the fusions and 54-56 kDa for the isolated P450 enzymes (right). Panels for the FMND/CYP2A6 and CYP2A6 from Figure 1 are presented again here to facilitate comparisons between enzymes.

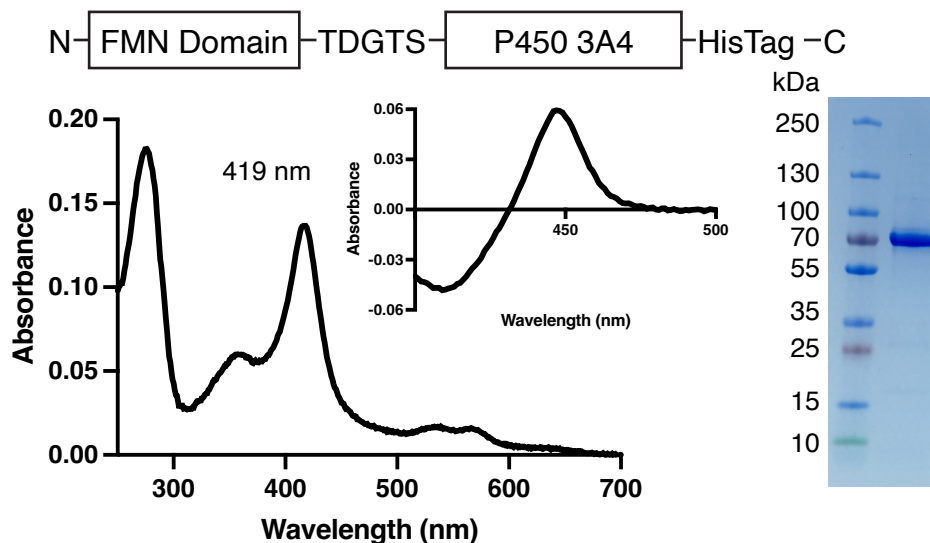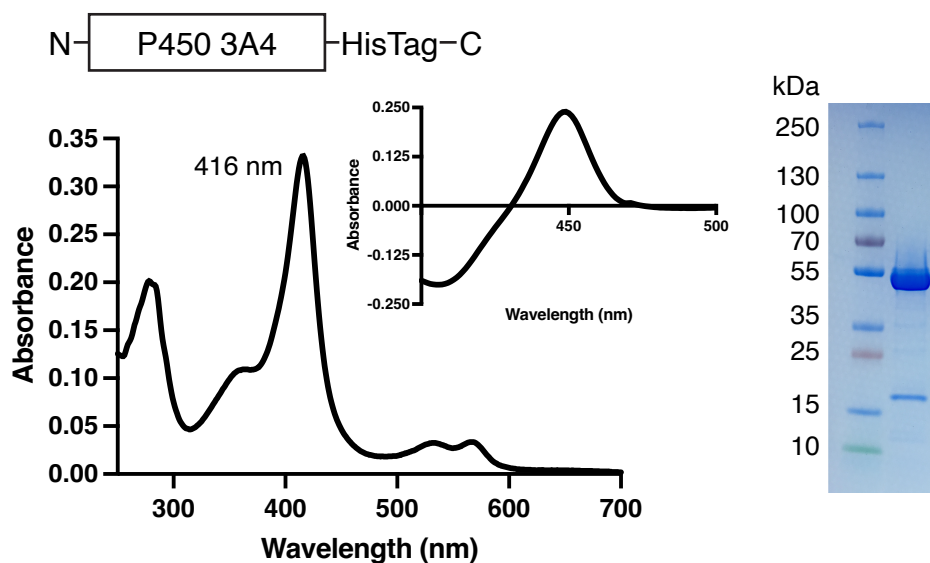

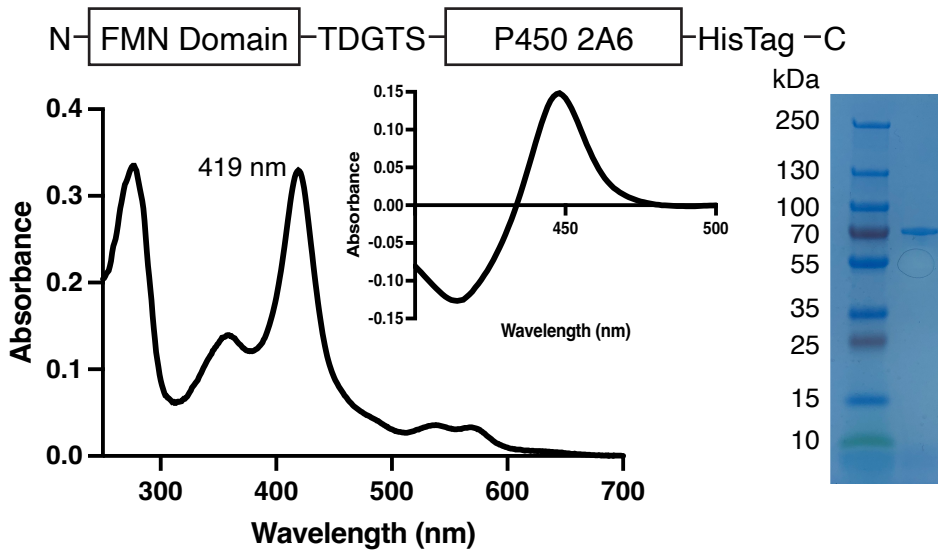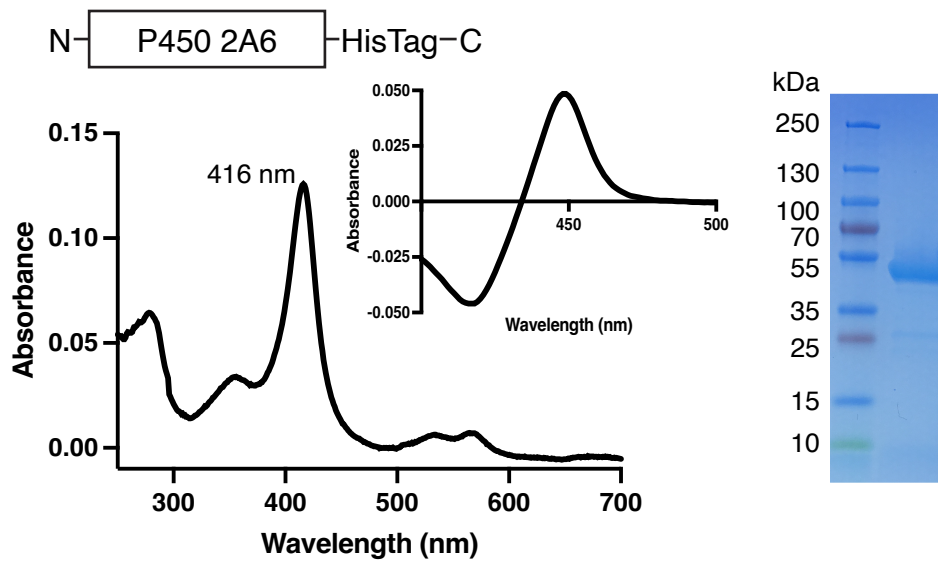

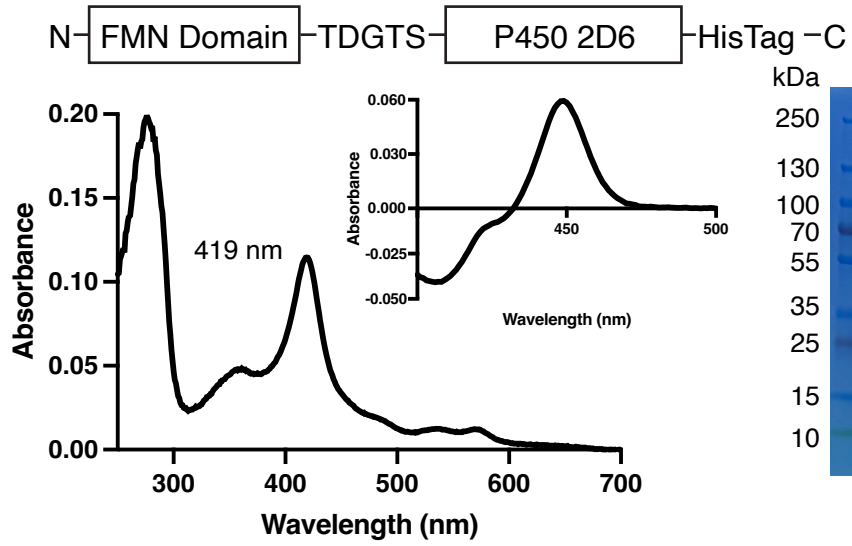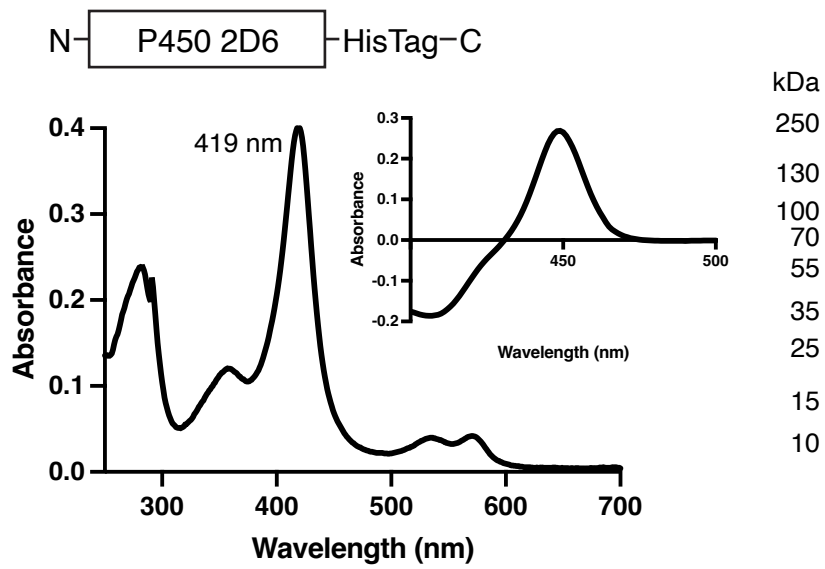

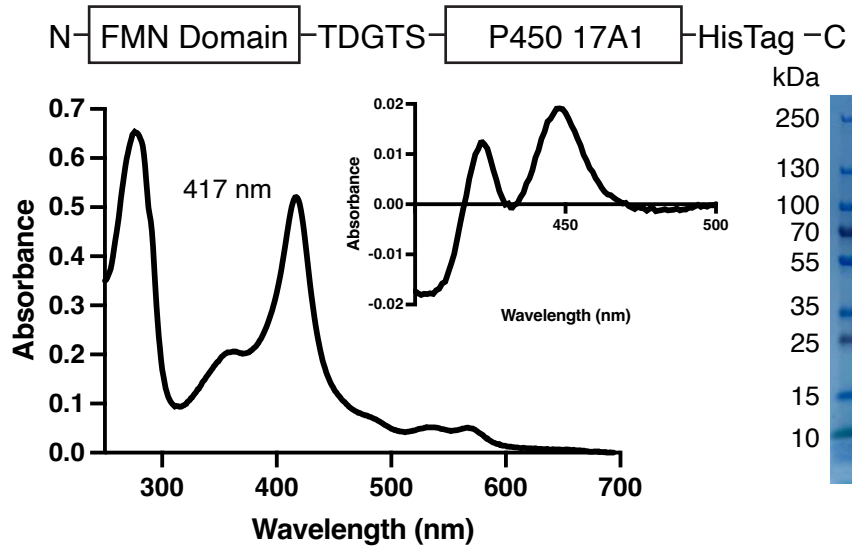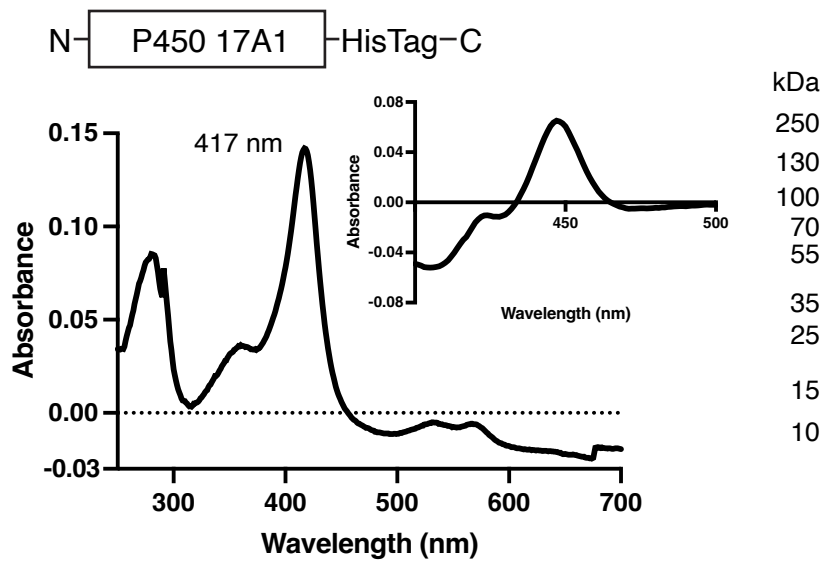

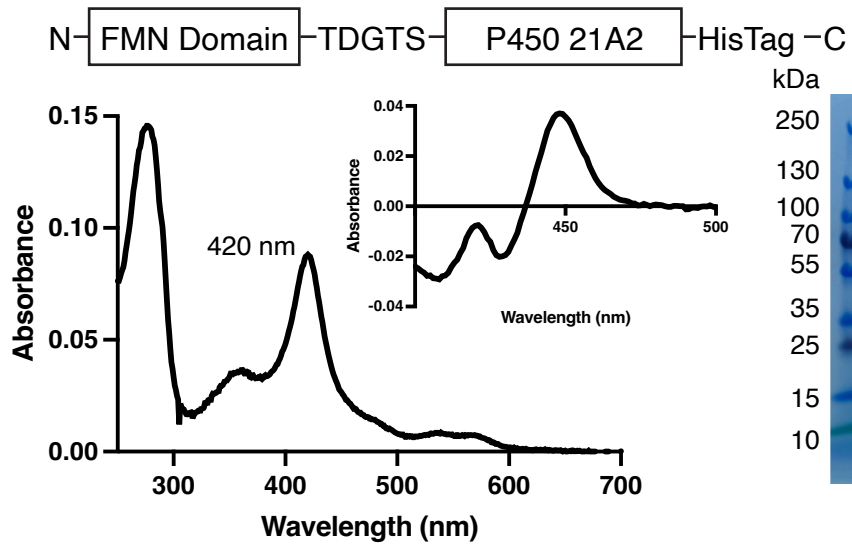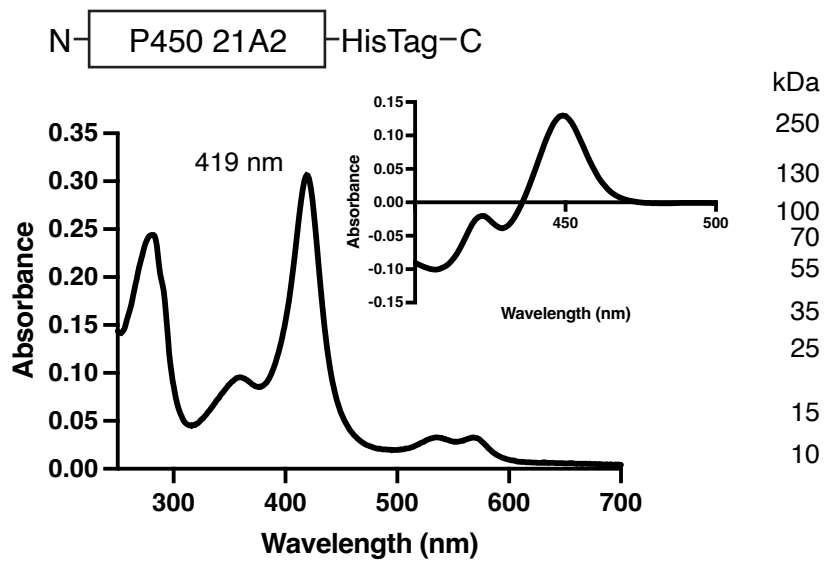

**Supporting Figure 4. Spectral titrations for drug-metabolizing P450 enzymes CYP3A4, CYP2A6, and CYP2D6.** Low ligand concentrations are shown in light grey and higher concentrations in darker grey. For CYP3A4 and FMND/CYP3A4 the ligands and their concentrations are hydrocortisone (10  $\mu$ M-1.5 mM) and clotrimazole (0.9-67 nM). For CYP2D6 and FMND/CYP2D6 the ligands and their concentrations are thioridazine (1-450  $\mu$ M) and prinomastat (0.2-84  $\mu$ M). For CYP2A6 and FMND/CYP2A6 the ligands and their concentrations are coumarin (0.5-699  $\mu$ M) and pilocarpine (0.5-439  $\mu$ M).

## Hydrocortisone

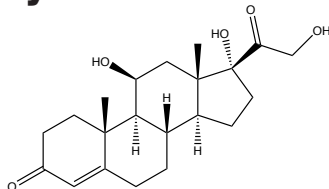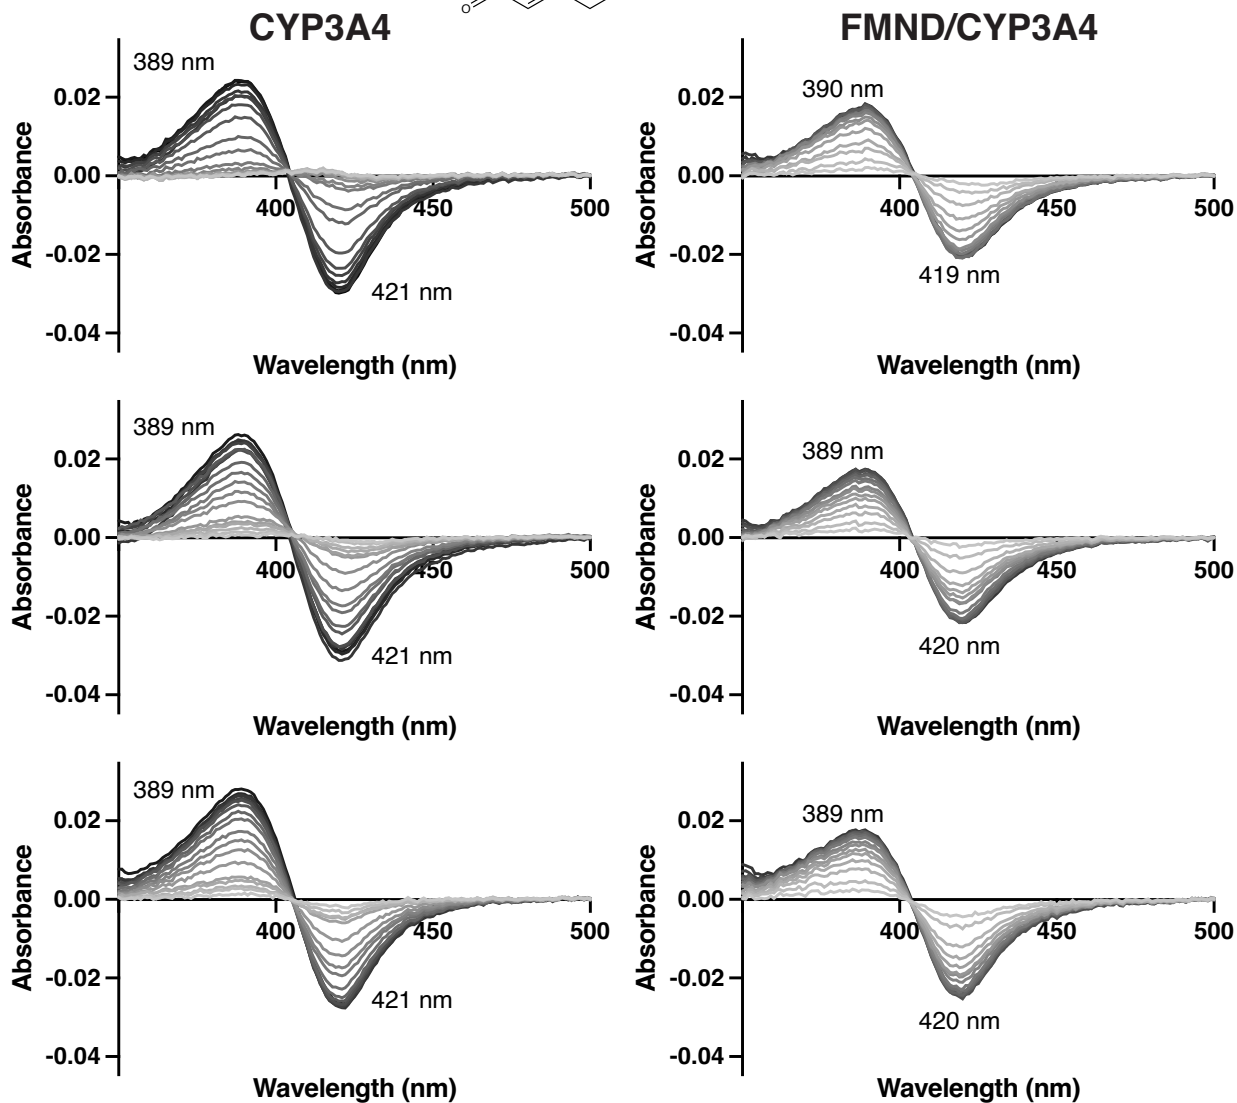

# Clotrimazole

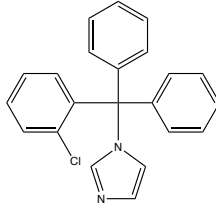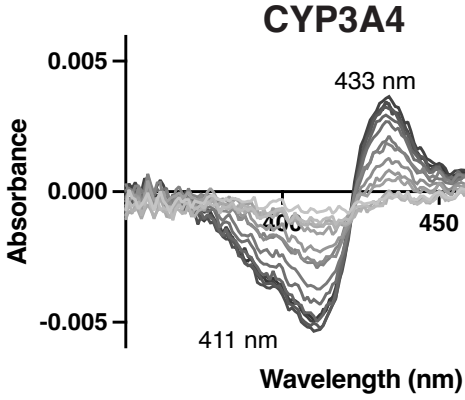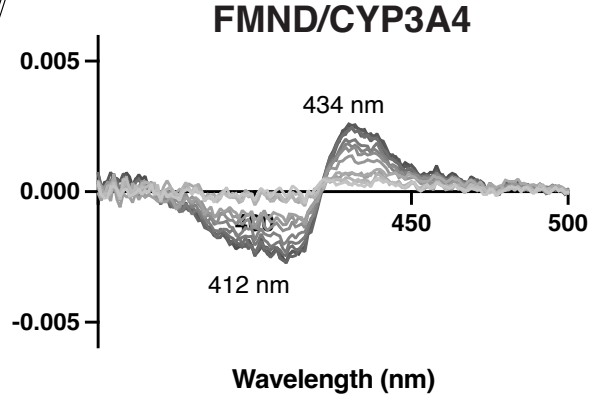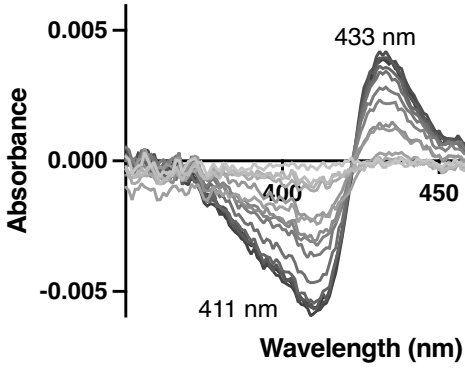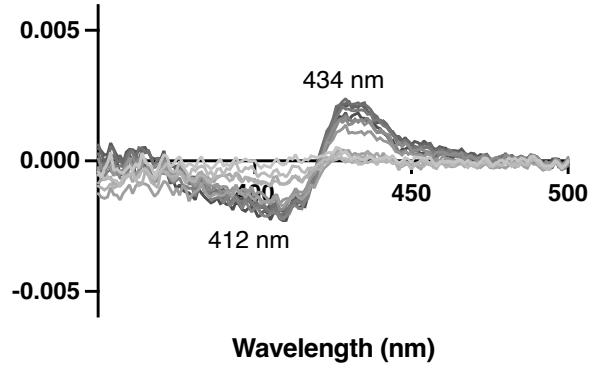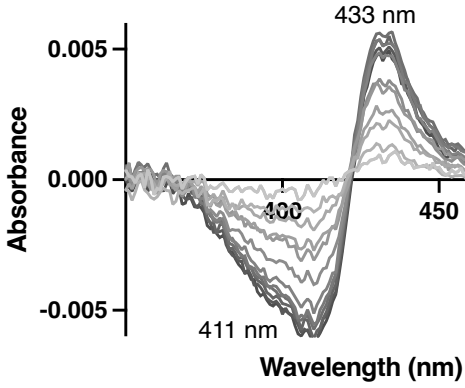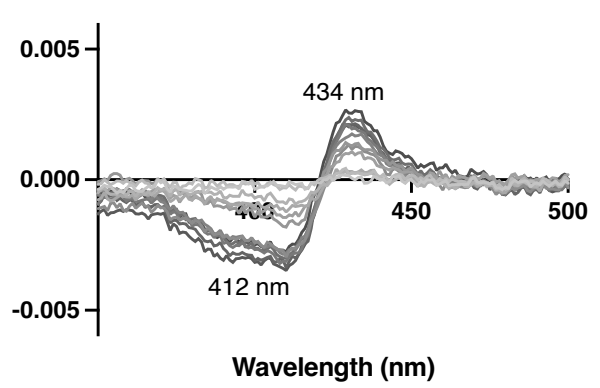



# Thioridazine

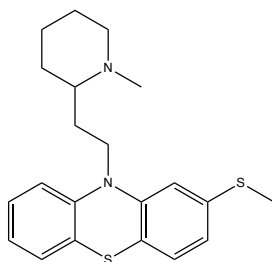

### CYP2D6

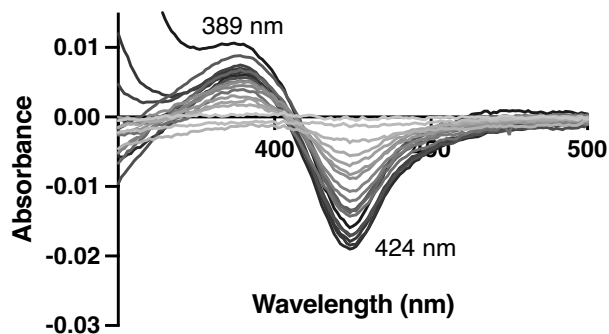

### FMND/CYP2D6

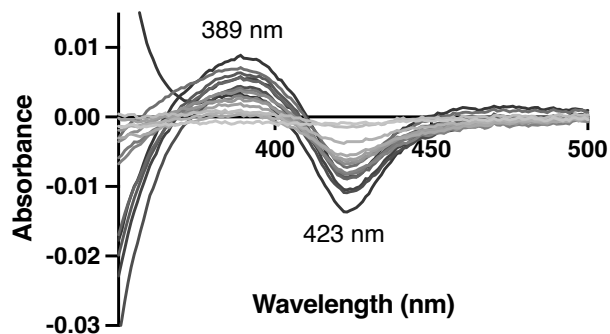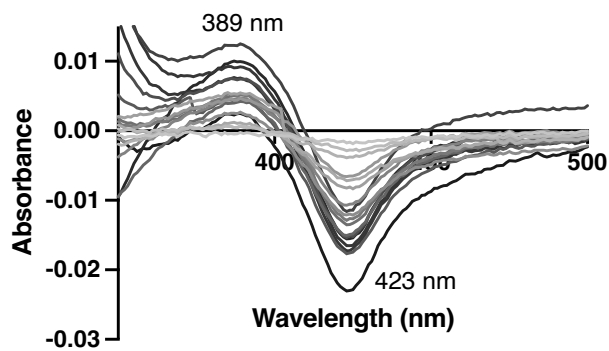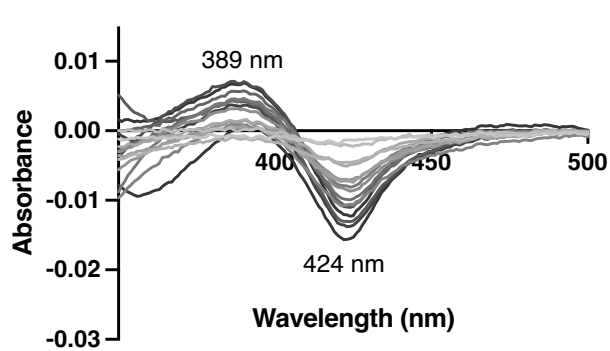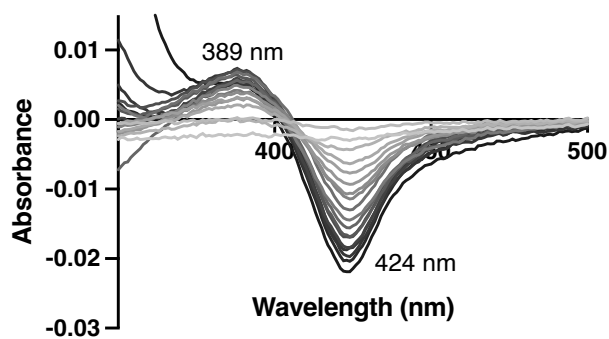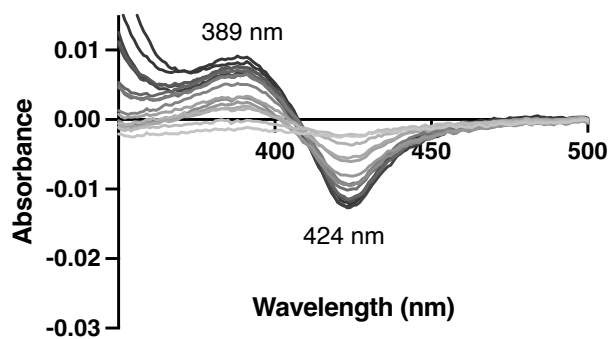

# Prinomastat

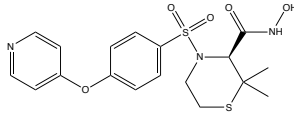

## CYP2D6

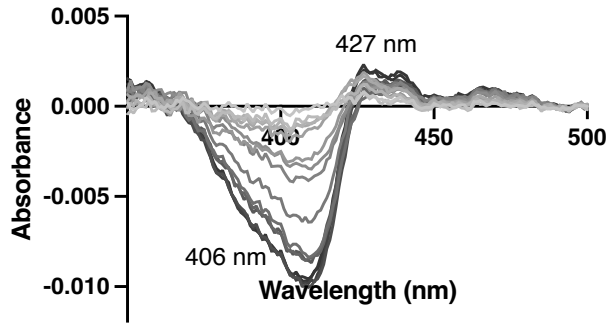

## FMND/CYP2D6

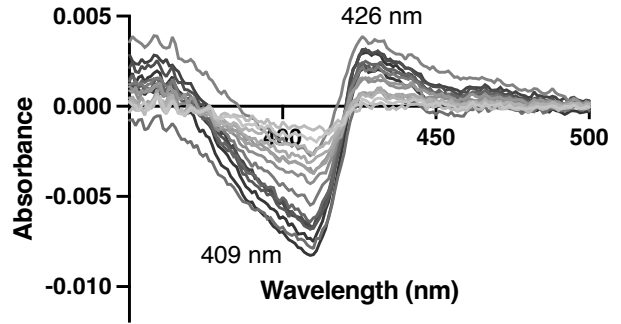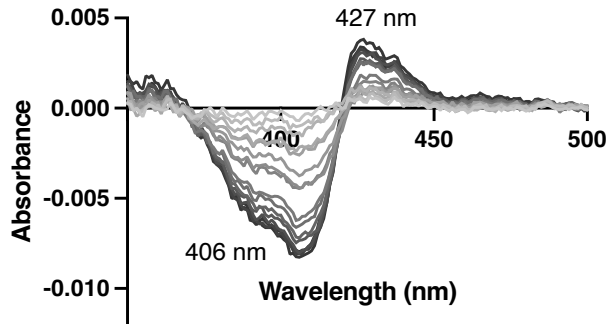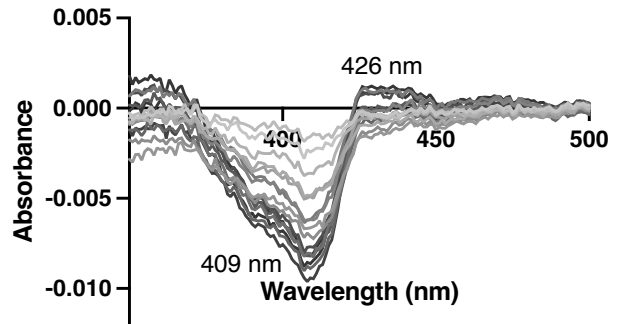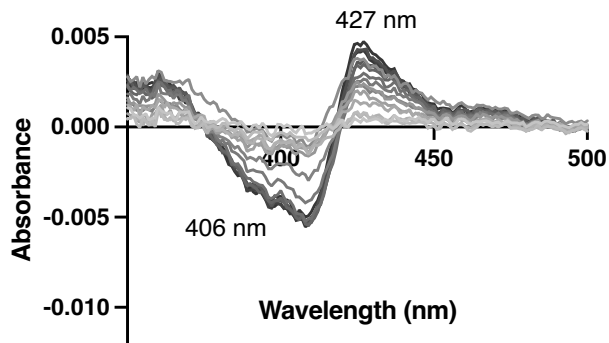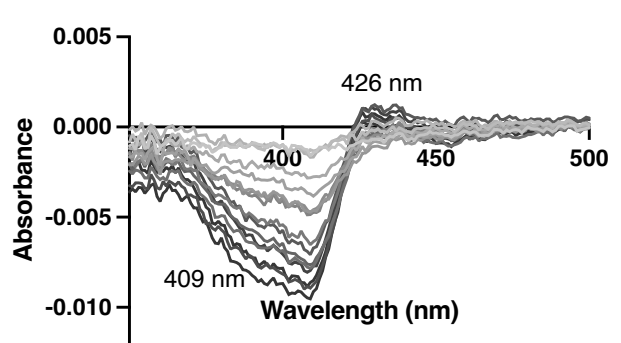

# Coumarin

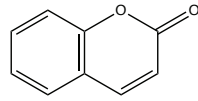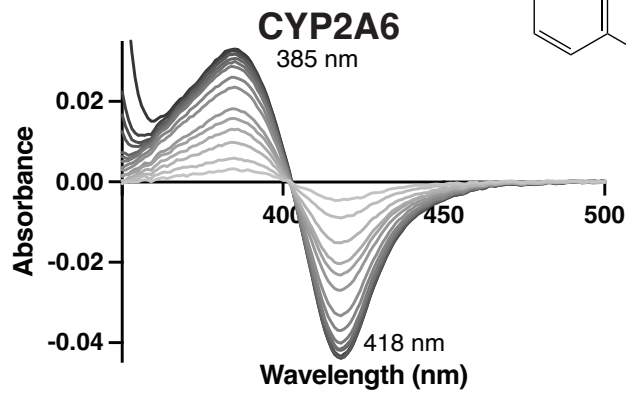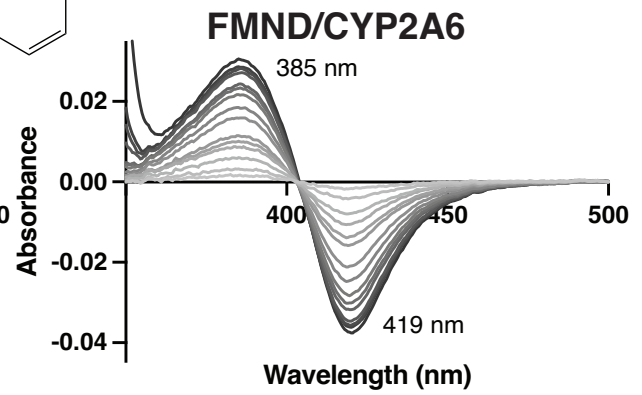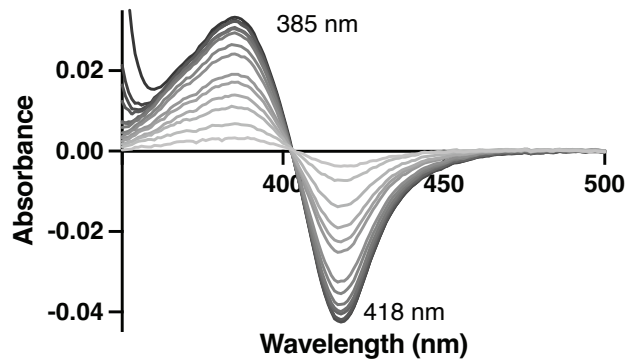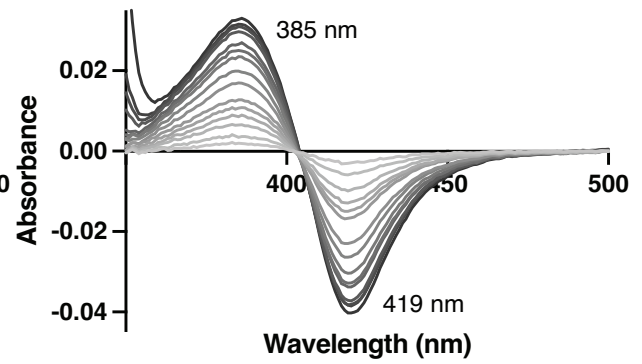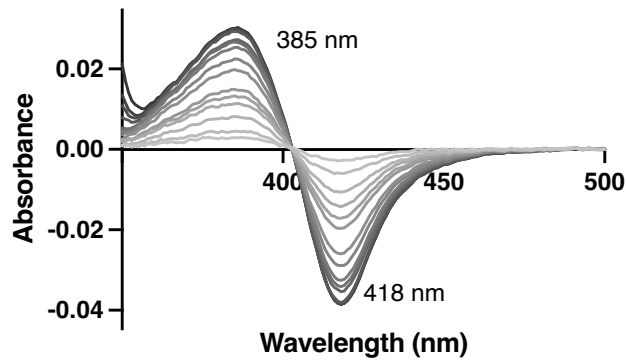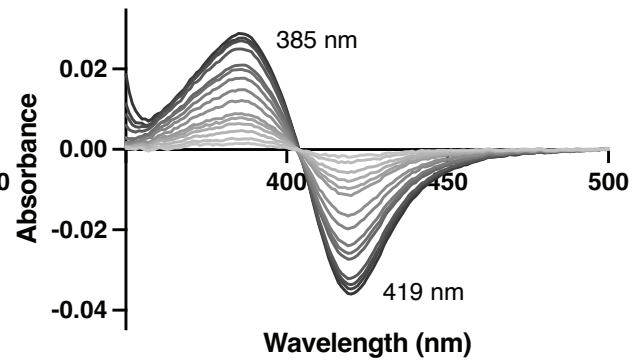

# Pilocarpine

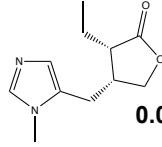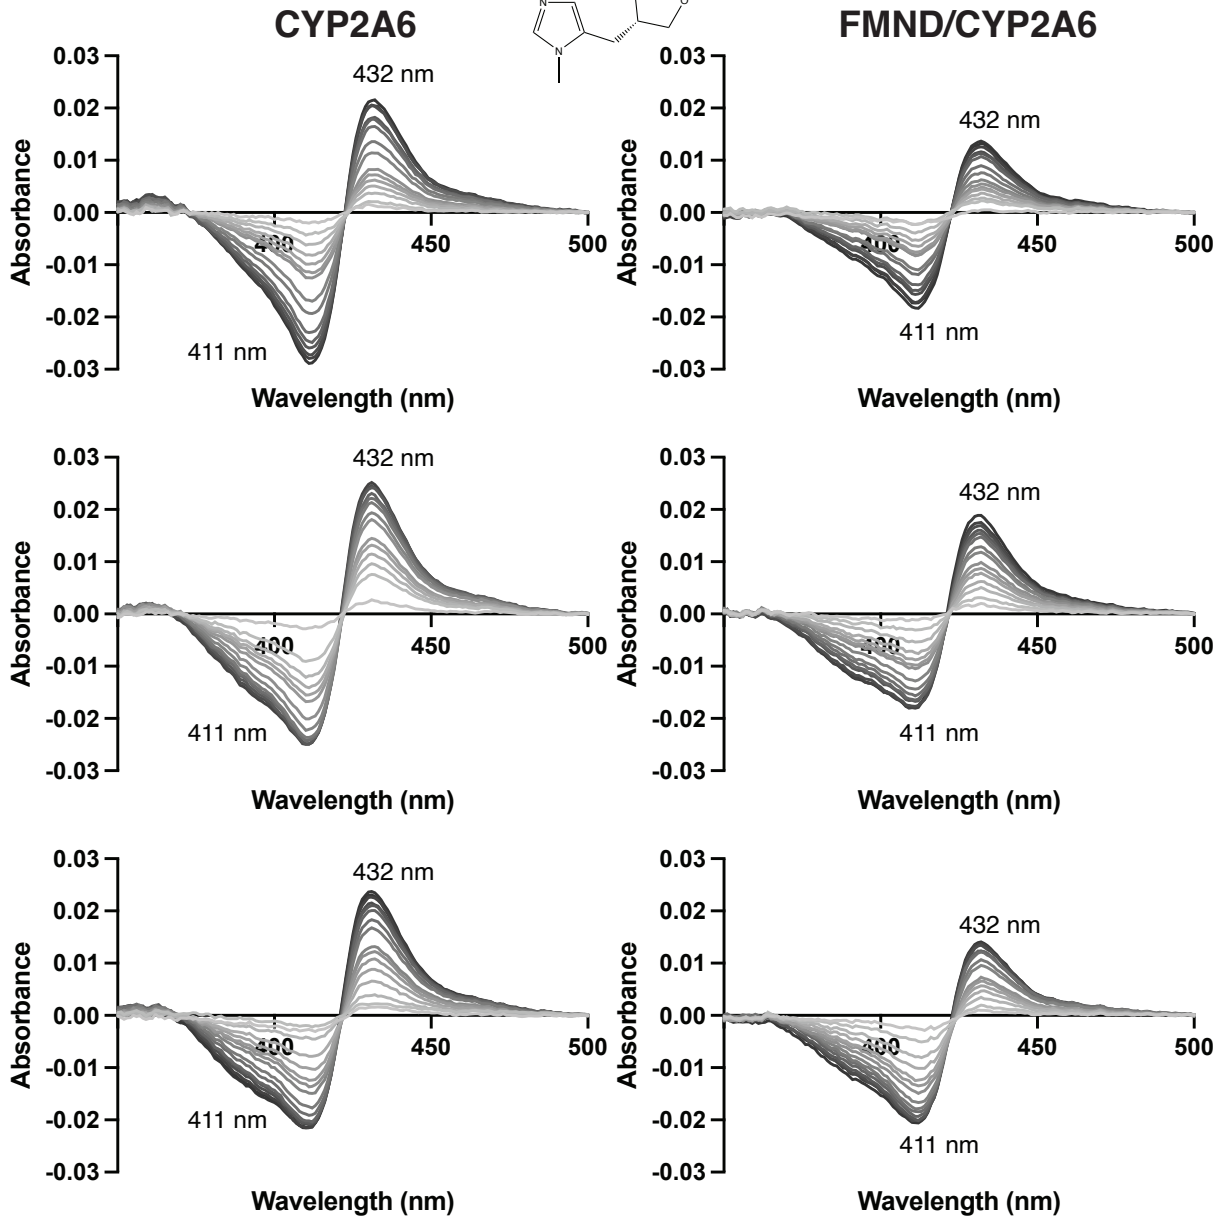

**Supporting Figure 5. Spectral titrations for steroidogenic CYP17A1 and CYP21A2 and their corresponding FMND/CYP450 fusion proteins.** Low ligand concentrations are shown in light grey and higher concentrations in darker grey. For CYP17A1 the ligands and their concentration ranges are progesterone (20 nM-12.2  $\mu$ M), pregnenolone (20 nM-5  $\mu$ M), 17 $\alpha$ -hydroxyprogesterone (20 nM-23  $\mu$ M), 17  $\alpha$ -hydroxypregnenolone (20 nM-5  $\mu$ M), and ketoconazole (20 nM-2.6  $\mu$ M). For CYP21A2 the ligands and their concentration ranges are progesterone (50 nM-33  $\mu$ M), 17  $\alpha$ -hydroxyprogesterone (100 nM-30  $\mu$ M), and ketoconazole (20 nM-20 $\mu$ M).

## Progesterone

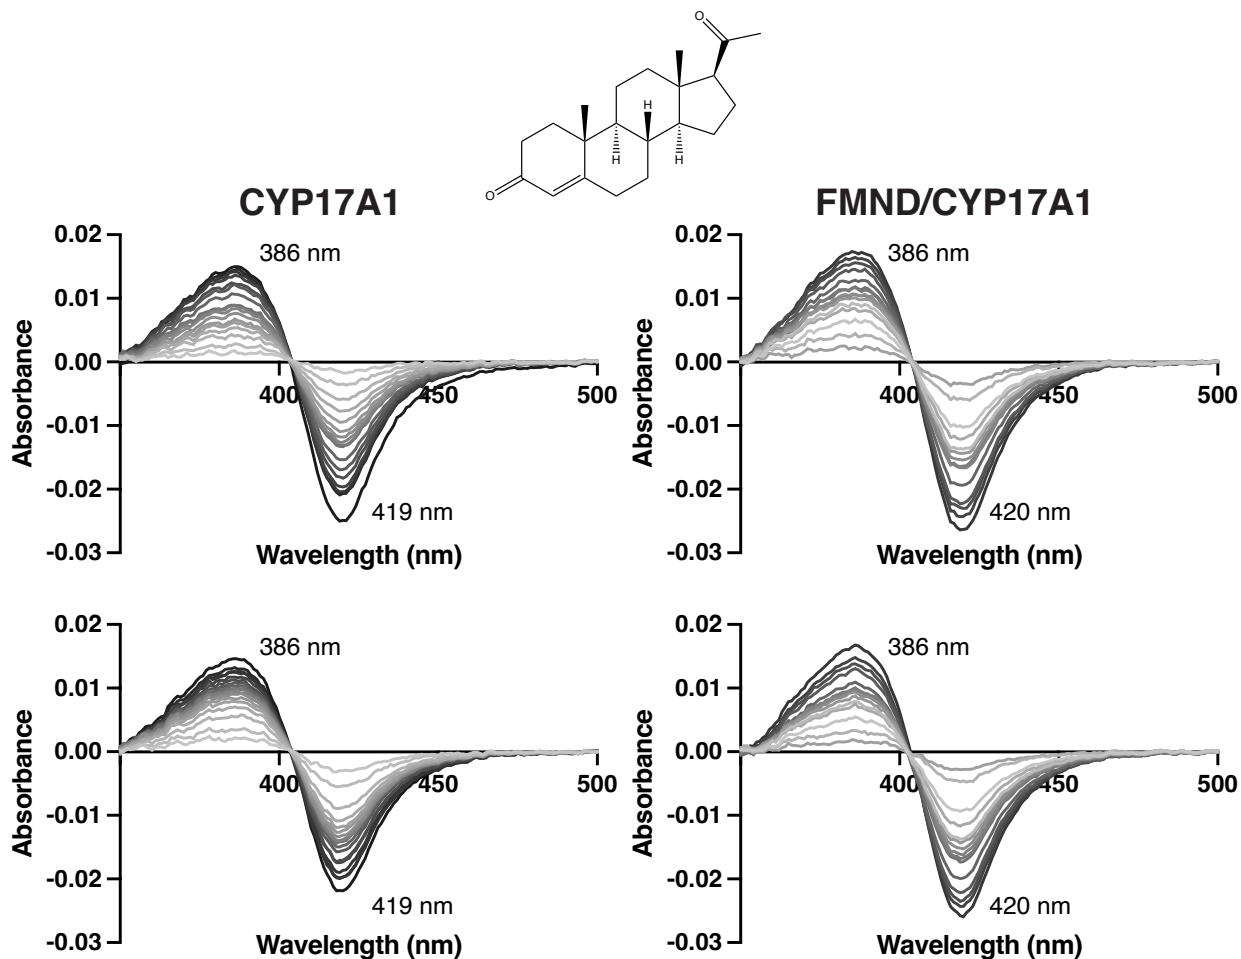

# Pregnenolone

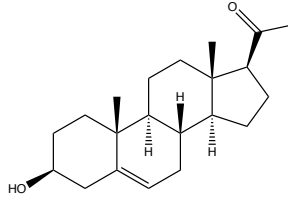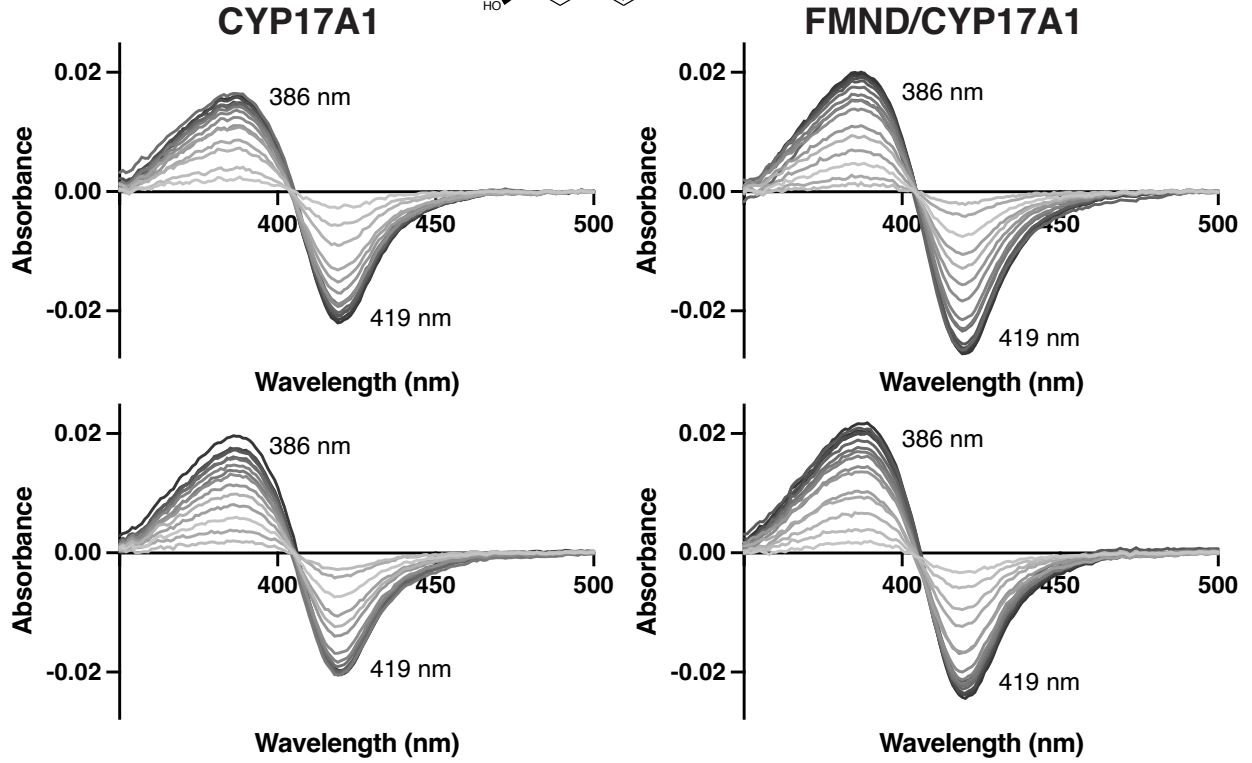

# 17 $\alpha$ -Hydroxyprogesterone

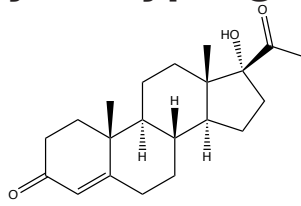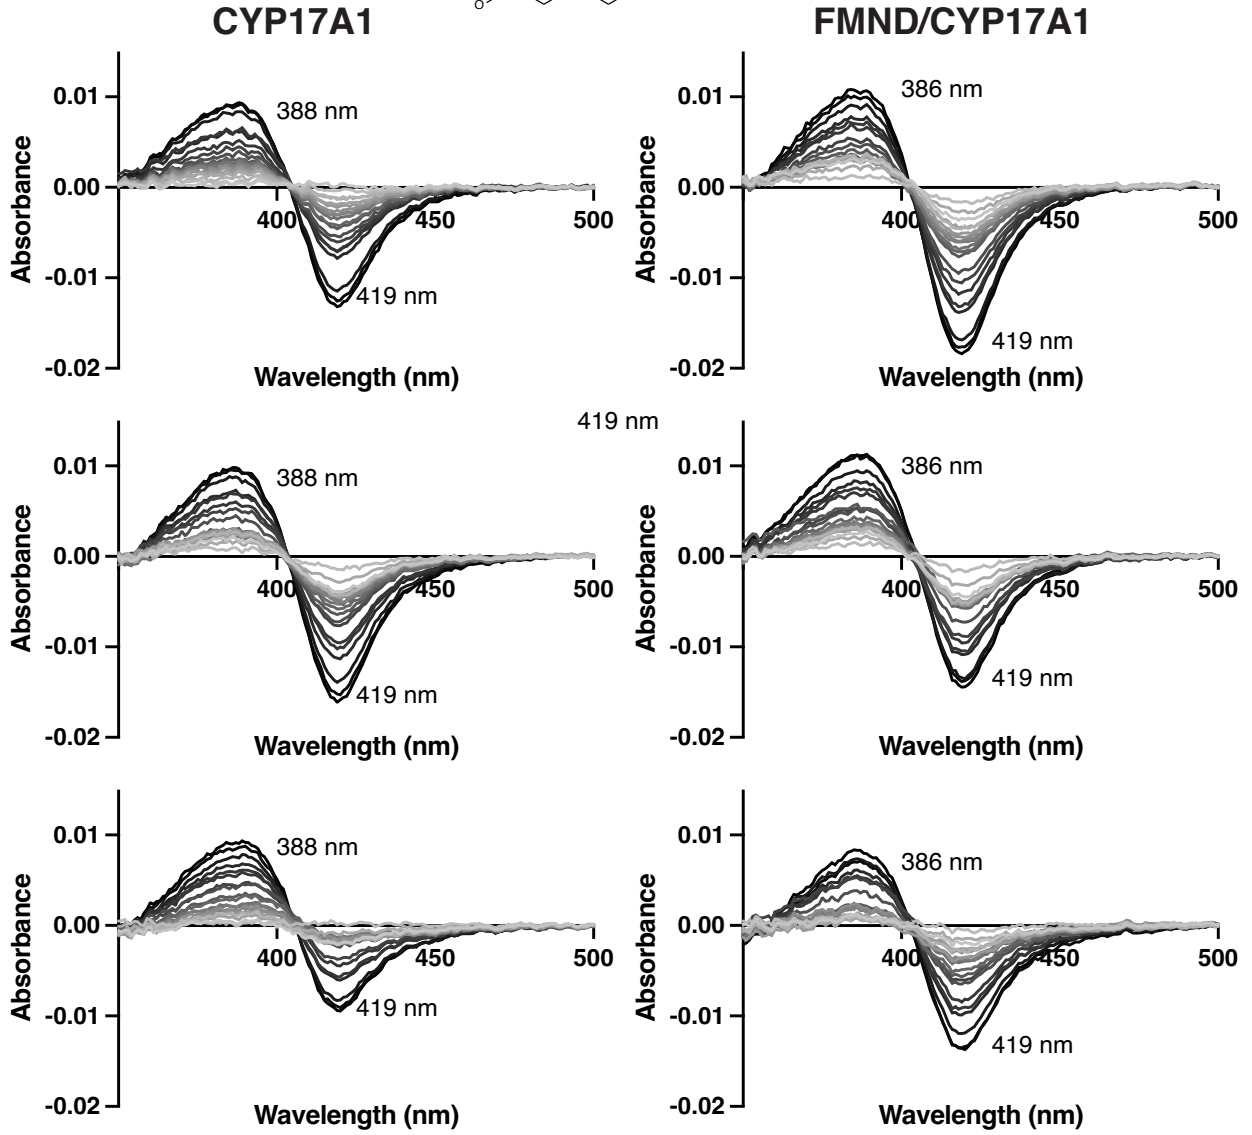

# 17 $\alpha$ -Hydroxypregnenolone

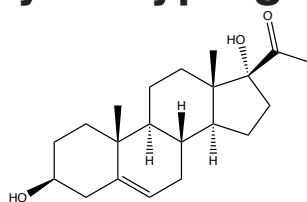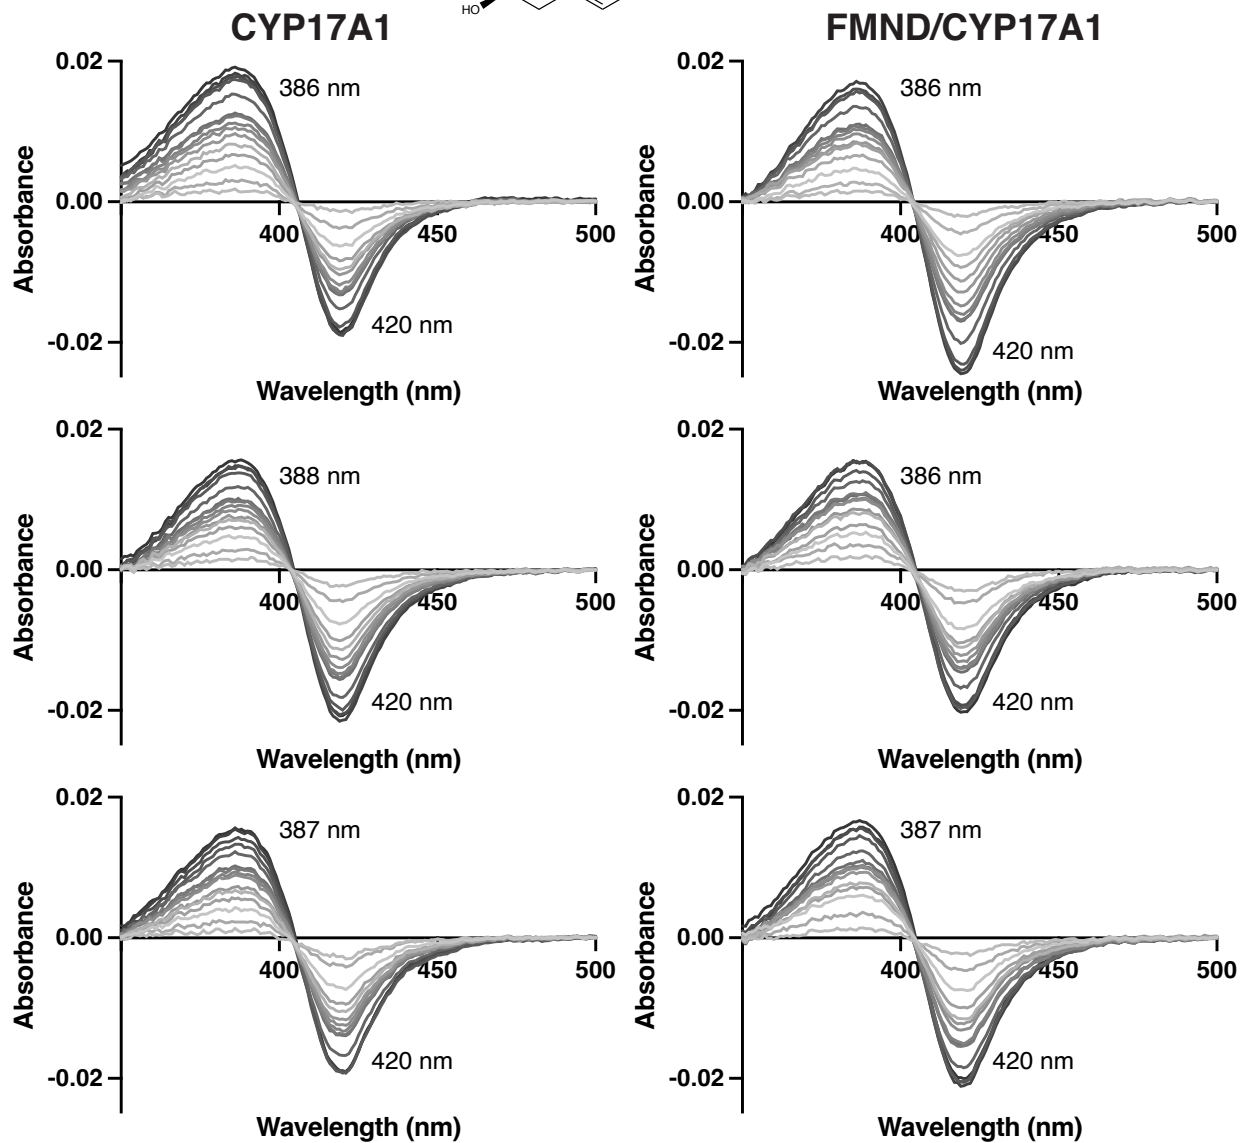



# Ketoconazole

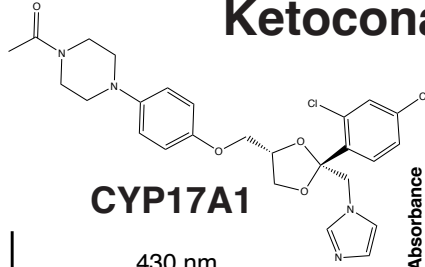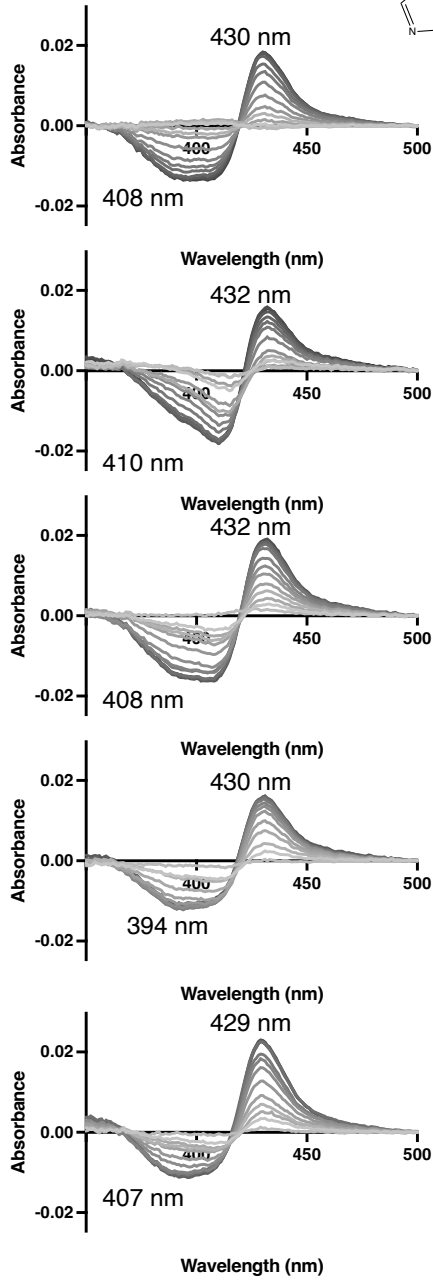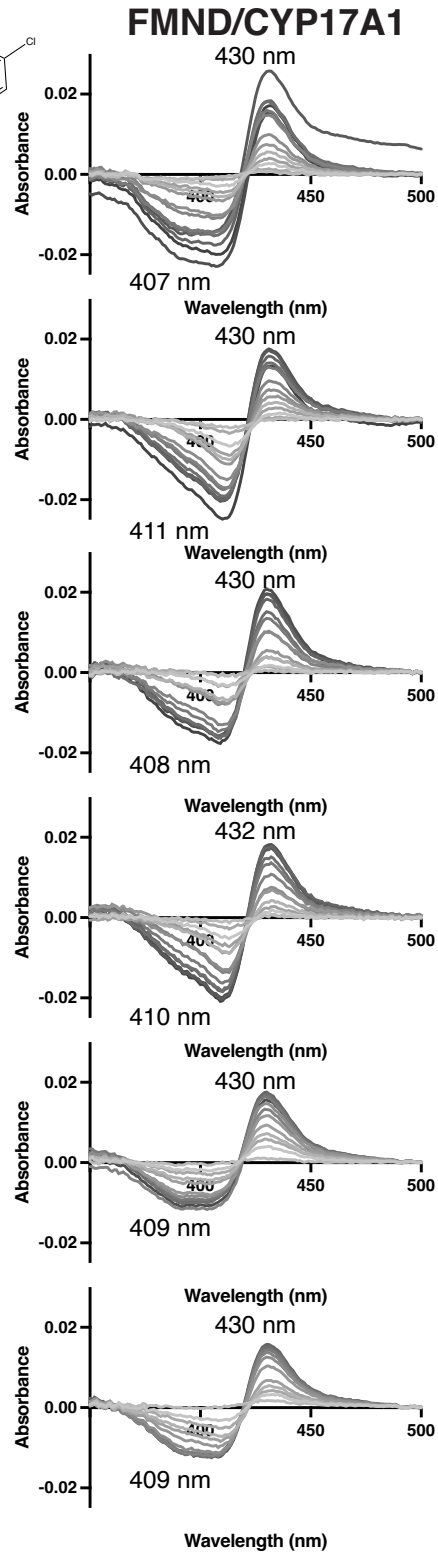

# Progesterone

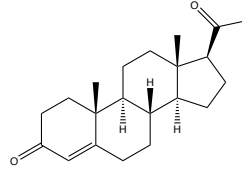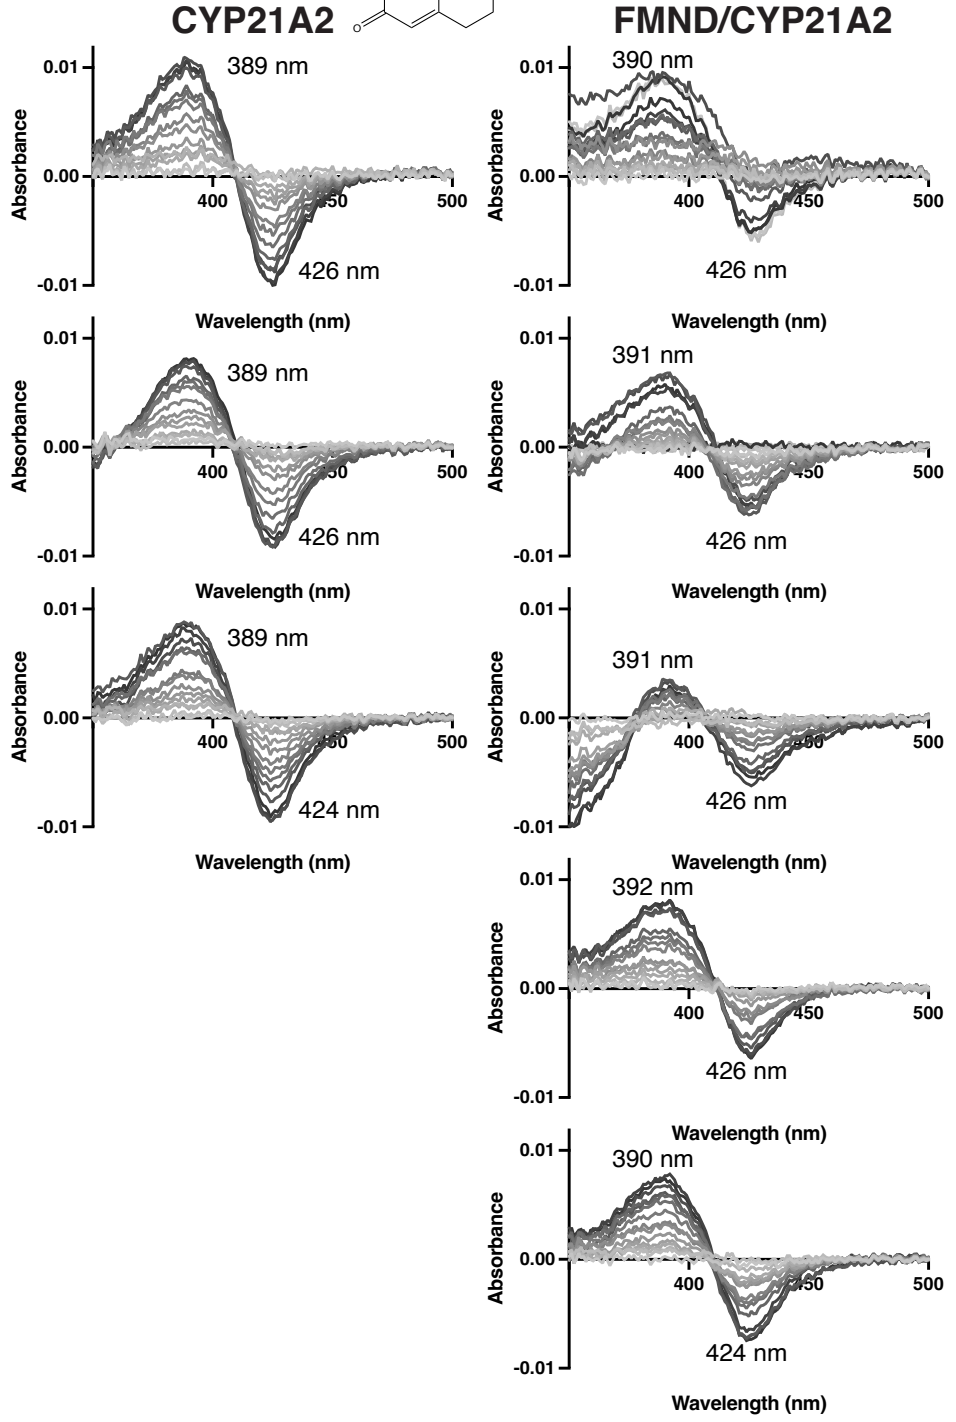

# 17 $\alpha$ -Hydroxyprogesterone

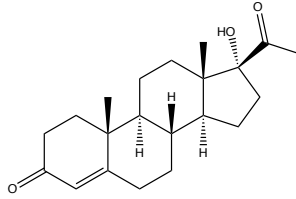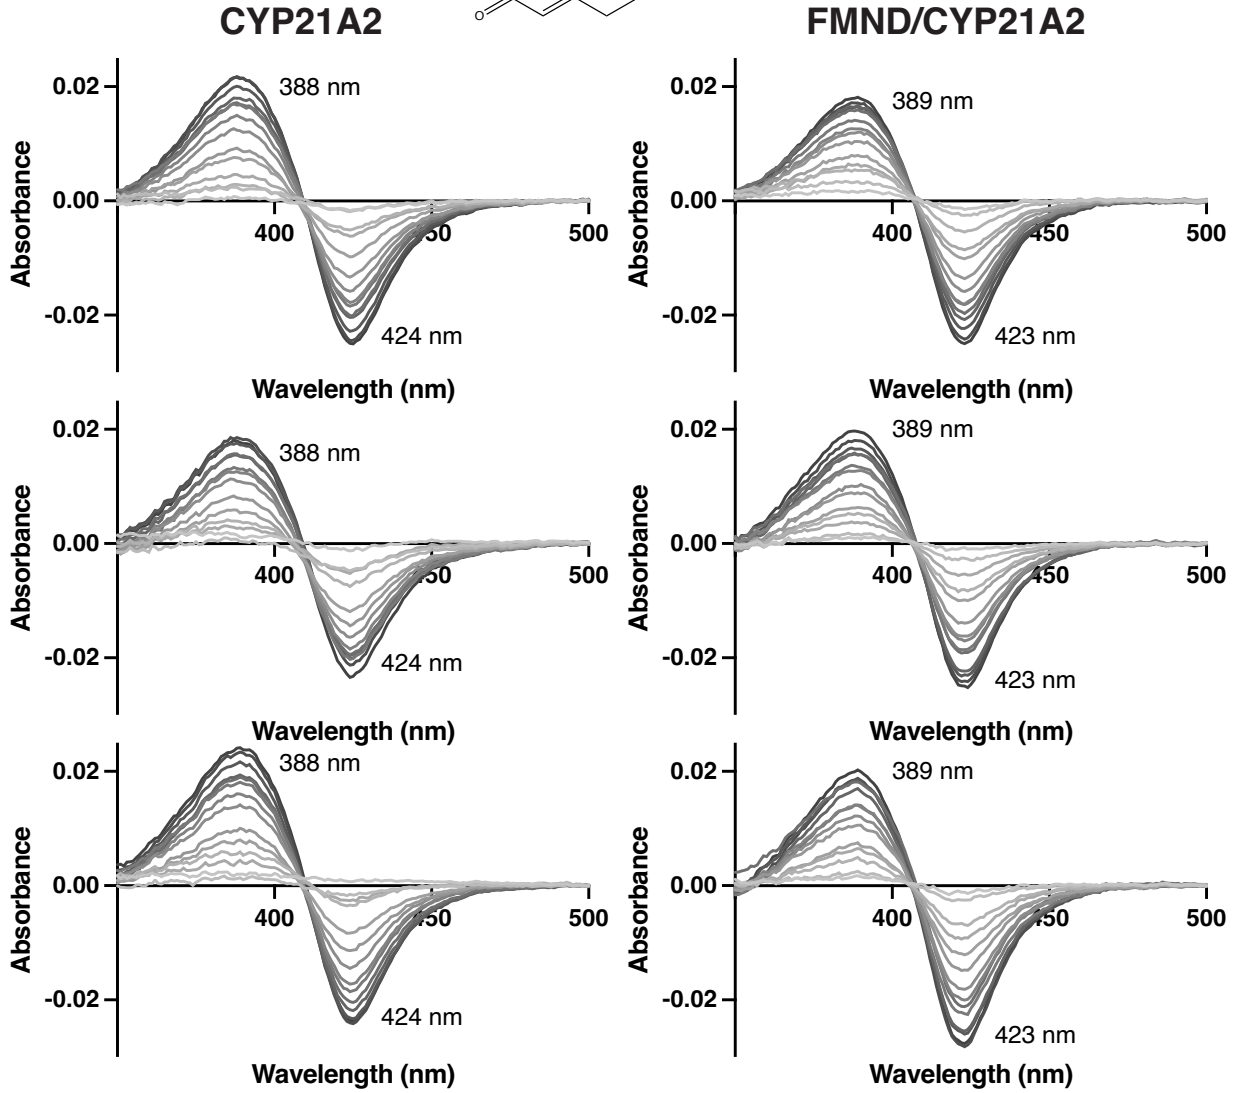

# Ketoconazole

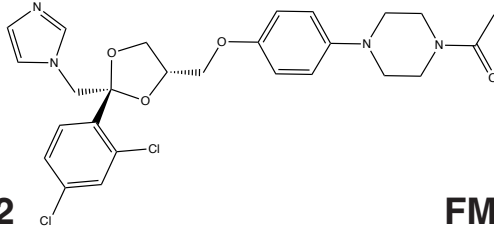

**CYP21A2**

**FMND/CYP21A2**

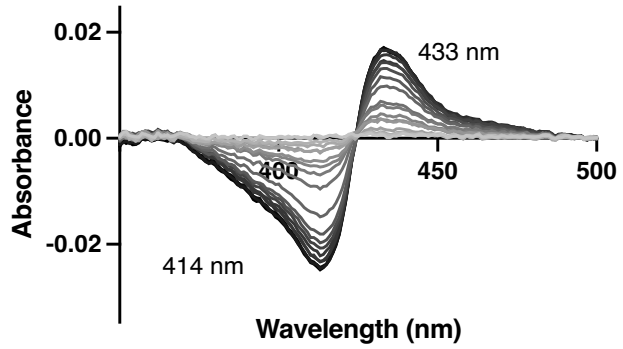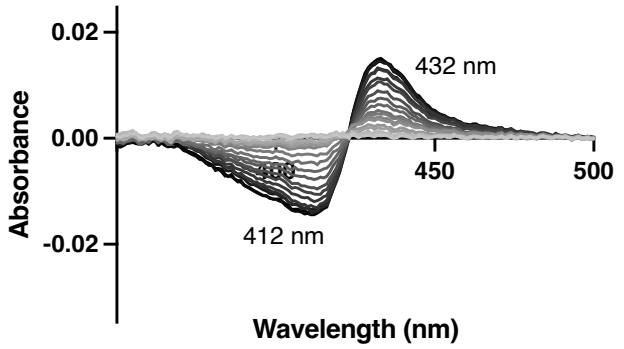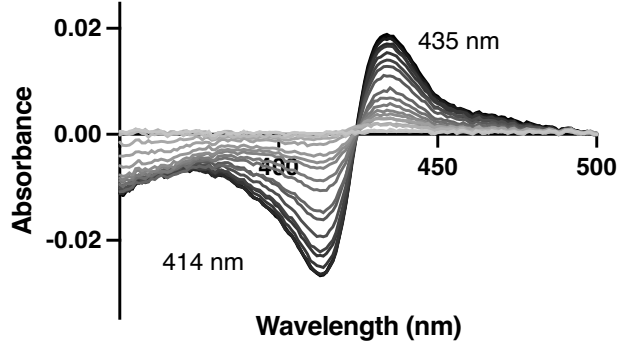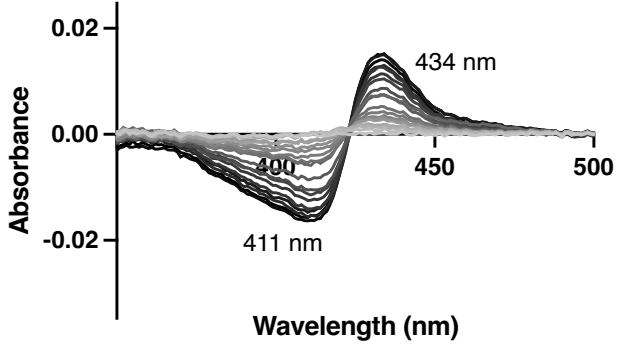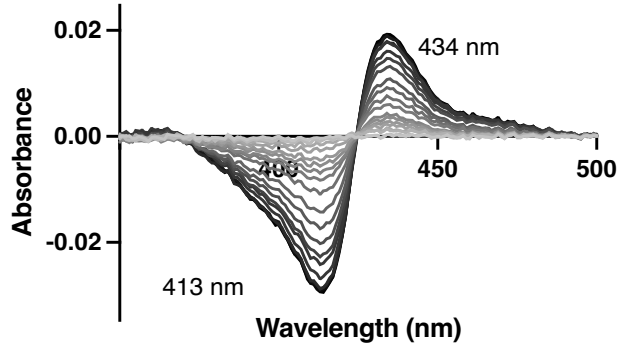

Supplement: mmc1.pdf [file mmc1.pdf]
